# Supplementary material for: Structural Homology-Based Drug Repurposing Approach for Targeting NSP12 SARS-CoV-2
Source: MDPI journal article supplement (doi:10.3390/molecules27227732), 2022-11-10
Supplement: s1 [file s1]

**Table S1.** NSP-12 homologous structures predicted by DALI server.

| Rank | PDB  | Chain | Z_score | rmsd | lali | nres | % id | Description                      |
|------|------|-------|---------|------|------|------|------|----------------------------------|
| 1    | 6nus | A     | 64.5    | 0    | 715  | 715  | 100  | NSP12                            |
| 2    | 6nur | A     | 50.7    | 0.7  | 715  | 793  | 100  | NSP12                            |
| 3    | 3uqs | C     | 25.4    | 2.9  | 363  | 475  | 11   | RNA-DEPENDENT RNA POLYMERASE     |
| 4    | 3ur0 | B     | 25.1    | 2.9  | 366  | 476  | 11   | RNA-DEPENDENT RNA POLYMERASE     |
| 5    | 4nrt | A     | 24.9    | 3.1  | 369  | 500  | 10   | HNV-RDRP                         |
| 6    | 3sfg | B     | 24.9    | 3    | 364  | 474  | 11   | RNA POLYMERASE                   |
| 7    | 3bso | A     | 24.9    | 3.3  | 369  | 479  | 10   | RNA DEPENDENT RNA POLYMERASE     |
| 8    | 3upf | A     | 24.7    | 2.9  | 365  | 476  | 11   | RNA-DEPENDENT RNA POLYMERASE     |
| 9    | 5y3d | F     | 24.7    | 2.9  | 364  | 481  | 11   | RNA-DEPENDENT RNA POLYMERASE     |
| 10   | 3nai | B     | 24.6    | 2.9  | 365  | 486  | 11   | RNA DEPENDENT RNA POLYMERASE     |
| 11   | 3uqs | B     | 24.6    | 2.9  | 366  | 482  | 11   | RNA-DEPENDENT RNA POLYMERASE     |
| 12   | 1sh2 | A     | 24.6    | 3.1  | 371  | 502  | 10   | RNA POLYMERASE                   |
| 13   | 3uqs | A     | 24.5    | 2.9  | 366  | 478  | 11   | RNA-DEPENDENT RNA POLYMERASE     |
| 14   | 4o4r | A     | 24.4    | 2.9  | 363  | 476  | 12   | RNA-DEPENDENT-RNA-POLYMERASE     |
| 15   | 3qid | C     | 24.4    | 2.9  | 366  | 492  | 11   | RNA DEPENDENT RNA POLYMERASE     |
| 16   | 3ur0 | C     | 24.4    | 3    | 362  | 474  | 11   | RNA-DEPENDENT RNA POLYMERASE     |
| 17   | 3sfu | C     | 24.3    | 2.9  | 363  | 478  | 11   | RNA POLYMERASE                   |
| 18   | 3sfg | A     | 24.3    | 3    | 362  | 480  | 11   | RNA POLYMERASE                   |
| 19   | 2cjg | A     | 24.2    | 3.7  | 392  | 546  | 11   | RNA-DIRECTED RNA POLYMERASE      |
| 20   | 4nru | A     | 24      | 2.9  | 363  | 477  | 11   | RNA DEPENDENT RNA POLYMERASE     |
| 21   | 4lq9 | A     | 23.9    | 3    | 368  | 501  | 10   | RNA-DEPENDENT RNA-POLYMERASE     |
| 22   | 1wne | A     | 23.9    | 2.9  | 366  | 476  | 11   | 5'-R(*CP*AP*UP*GP*GP*GP*CP*C)-3' |
| 23   | 2b43 | D     | 23.8    | 3    | 367  | 501  | 10   | NON-STRUCTURAL POLYPROTEIN       |
| 24   | 2wk4 | B     | 23.6    | 3.2  | 376  | 502  | 12   | PROTEASE-POLYMERASE P70          |
| 25   | 1sh0 | A     | 23.6    | 3    | 372  | 502  | 10   | RNA POLYMERASE                   |
| 26   | 5jxs | A     | 23.5    | 2.9  | 367  | 476  | 11   | RNA DEPENDENT RNA POLYMERASE     |
| 27   | 6gvv | A     | 23.4    | 2.8  | 365  | 480  | 11   | RNA POLYMERASE 3D                |
| 28   | 4nru | C     | 23.3    | 2.9  | 366  | 478  | 11   | RNA DEPENDENT RNA POLYMERASE     |
| 29   | 3nai | A     | 23.3    | 2.9  | 365  | 486  | 12   | RNA DEPENDENT RNA POLYMERASE     |
| 30   | 3qid | B     | 23.2    | 2.9  | 365  | 492  | 11   | RNA DEPENDENT RNA POLYMERASE     |
| 31   | 5y3d | C     | 23.2    | 2.8  | 364  | 480  | 11   | RNA-DEPENDENT RNA POLYMERASE     |
| 32   | 5y3d | B     | 23.2    | 2.8  | 361  | 479  | 11   | RNA-DEPENDENT RNA POLYMERASE     |
| 33   | 2d7s | A     | 23.2    | 2.8  | 365  | 474  | 11   | RNA-DEPENDENT RNA POLYMERASE     |
| 34   | 4nru | E     | 23.1    | 2.9  | 364  | 477  | 11   | RNA DEPENDENT RNA POLYMERASE     |
| 35   | 4nz0 | F     | 23.1    | 2.8  | 361  | 460  | 12   | GENOME POLYPROTEIN               |
| 36   | 4wfy | A     | 23.1    | 2.7  | 351  | 462  | 14   | RNA-DIRECTED RNA POLYMERASE      |
| 37   | 3sfu | B     | 23      | 2.9  | 368  | 487  | 11   | RNA POLYMERASE                   |
| 38   | 4nru | F     | 23      | 2.9  | 361  | 473  | 11   | RNA DEPENDENT RNA POLYMERASE     |
| 39   | 4nz0 | E     | 23      | 2.8  | 359  | 460  | 13   | GENOME POLYPROTEIN               |

|    |      |   |      |     |     |     |    |                                    |
|----|------|---|------|-----|-----|-----|----|------------------------------------|
| 40 | 3nah | A | 23   | 3   | 368 | 486 | 11 | RNA DEPENDENT RNA POLYMERASE       |
| 41 | 3nah | C | 22.9 | 2.9 | 364 | 485 | 11 | RNA DEPENDENT RNA POLYMERASE       |
| 42 | 3qid | A | 22.9 | 3   | 364 | 492 | 11 | RNA DEPENDENT RNA POLYMERASE       |
| 43 | 3ur0 | A | 22.9 | 2.9 | 362 | 475 | 11 | RNA-DEPENDENT RNA POLYMERASE       |
| 44 | 4wfx | A | 22.9 | 2.7 | 348 | 462 | 15 | RNA-DIRECTED RNA POLYMERASE        |
| 45 | 3klv | A | 22.9 | 2.8 | 364 | 476 | 11 | 3D POLYMERASE                      |
| 46 | 4qpx | A | 22.9 | 3.2 | 368 | 495 | 11 | POLYPROTEIN                        |
| 47 | 3upf | B | 22.9 | 2.9 | 365 | 483 | 11 | RNA-DEPENDENT RNA POLYMERASE       |
| 48 | 1khv | B | 22.9 | 3.2 | 384 | 497 | 13 | RNA-DIRECTED RNA POLYMERASE        |
| 49 | 2e9t | A | 22.8 | 2.8 | 364 | 474 | 11 | 5'-R(P*UP*AP*GP*GP*GP*CP*CP*C)-3'  |
| 50 | 2uuw | A | 22.8 | 3.2 | 377 | 490 | 11 | RNA-DIRECTED RNA POLYMERASE        |
| 51 | 3ol6 | I | 22.8 | 2.9 | 355 | 461 | 15 | POLYMERASE                         |
| 52 | 3olb | A | 22.8 | 3   | 356 | 461 | 15 | POLYMERASE                         |
| 53 | 3h5y | A | 22.8 | 3.4 | 366 | 474 | 10 | RNA DEPENDENT RNA POLYMERASE       |
| 54 | 4k4t | A | 22.8 | 3   | 358 | 462 | 14 | RNA-DIRECTED RNA POLYMERASE 3D-POL |
| 55 | 3nah | B | 22.8 | 2.9 | 368 | 485 | 11 | RNA DEPENDENT RNA POLYMERASE       |
| 56 | 4k4t | E | 22.7 | 3   | 358 | 462 | 14 | RNA-DIRECTED RNA POLYMERASE 3D-POL |
| 57 | 5yf7 | A | 22.7 | 3.3 | 425 | 650 | 13 | RDRP CATALYTIC                     |
| 58 | 1s4f | A | 22.7 | 3.1 | 362 | 583 | 12 | RNA-DEPENDENT RNA POLYMERASE       |
| 59 | 3h5x | A | 22.7 | 3.3 | 366 | 470 | 10 | RNA DEPENDENT RNA POLYMERASE       |
| 60 | 2im0 | A | 22.7 | 3   | 356 | 461 | 14 | POLIOVIRUS POLYMERASE              |
| 61 | 6ae5 | A | 22.7 | 3.3 | 418 | 644 | 13 | RDRP CATALYTIC                     |
| 62 | 3ola | M | 22.6 | 2.9 | 357 | 461 | 15 | POLYMERASE                         |
| 63 | 4nz0 | C | 22.6 | 2.8 | 358 | 460 | 13 | GENOME POLYPROTEIN                 |
| 64 | 4r0e | A | 22.6 | 2.9 | 354 | 461 | 14 | RNA-DIRECTED RNA POLYMERASE        |
| 65 | 4nlv | A | 22.6 | 3   | 357 | 461 | 15 | RNA-DIRECTED RNA POLYMERASE 3D-POL |
| 66 | 5f8m | A | 22.6 | 3   | 356 | 462 | 15 | GENOME POLYPROTEIN                 |
| 67 | 1sh3 | B | 22.5 | 3.1 | 369 | 503 | 10 | RNA POLYMERASE                     |
| 68 | 3bsn | A | 22.5 | 3.4 | 367 | 479 | 10 | RNA DEPENDENT RNA POLYMERASE       |
| 69 | 5y6z | A | 22.5 | 3   | 355 | 457 | 15 | GENOME POLYPROTEIN                 |
| 70 | 2b43 | B | 22.4 | 3   | 367 | 501 | 10 | NON-STRUCTURAL POLYPROTEIN         |
| 71 | 5y3d | E | 22.4 | 2.8 | 364 | 483 | 11 | RNA-DEPENDENT RNA POLYMERASE       |
| 72 | 6ae6 | A | 22.3 | 3.3 | 422 | 647 | 13 | RDRP CATALYTIC                     |
| 73 | 1s4f | B | 22.2 | 3.1 | 364 | 583 | 12 | RNA-DEPENDENT RNA POLYMERASE       |
| 74 | 2b43 | C | 22.2 | 3   | 369 | 501 | 10 | NON-STRUCTURAL POLYPROTEIN         |
| 75 | 4o4r | C | 22.1 | 3   | 364 | 474 | 11 | RNA-DEPENDENT-RNA-POLYMERASE       |
| 76 | 3upf | C | 22.1 | 2.9 | 362 | 471 | 12 | RNA-DEPENDENT RNA POLYMERASE       |
| 77 | 1sh3 | A | 22.1 | 3   | 366 | 502 | 9  | RNA POLYMERASE                     |
| 78 | 5yf5 | A | 22   | 3.4 | 423 | 641 | 13 | RDRP CATALYTIC                     |

|     |      |   |      |     |     |     |    |                                        |
|-----|------|---|------|-----|-----|-----|----|----------------------------------------|
| 79  | 5y6r | A | 21.9 | 3.4 | 424 | 667 | 12 | GENOME POLYPROTEIN                     |
| 80  | 1s4f | C | 21.9 | 3.4 | 362 | 581 | 12 | RNA-DEPENDENT RNA POLYMERASE           |
| 81  | 4wyw | A | 21.8 | 2.8 | 364 | 479 | 11 | RNA-DIRECTED RNA POLYMERASE 3D-POL     |
| 82  | 5yf8 | A | 21.7 | 3.4 | 399 | 645 | 12 | RDRP CATALYTIC                         |
| 83  | 1khv | A | 21.6 | 3.2 | 384 | 493 | 13 | RNA-DIRECTED RNA POLYMERASE            |
| 84  | 4zp8 | A | 21.6 | 2.8 | 349 | 454 | 14 | RNA-DEPENDENT RNA POLYMERASE           |
| 85  | 5tsn | A | 21.4 | 3.2 | 371 | 500 | 11 | NORWALK VIRUS POLYMERASE               |
| 86  | 3ol9 | I | 21.3 | 3   | 357 | 461 | 15 | POLYMERASE                             |
| 87  | 4nlr | A | 21.3 | 3   | 356 | 461 | 15 | RNA-DIRECTED RNA POLYMERASE 3D-POL     |
| 88  | 3n6l | A | 21.2 | 2.9 | 355 | 462 | 15 | RNA-DEPENDENT RNA POLYMERASE           |
| 89  | 6ae6 | B | 21.1 | 3.7 | 425 | 647 | 12 | RDRP CATALYTIC                         |
| 90  | 3nl0 | A | 21   | 2.8 | 364 | 475 | 11 | 3D POLYMERASE                          |
| 91  | 4wtj | A | 21   | 3.8 | 365 | 555 | 12 | RNA TEMPLATE AUCC                      |
| 92  | 3nma | A | 21   | 2.8 | 365 | 476 | 11 | 3D POLYMERASE                          |
| 93  | 1yvz | A | 21   | 3.8 | 361 | 548 | 11 | RNA DEPENDENT RNA POLYMERASE           |
| 94  | 3kms | A | 20.8 | 2.8 | 364 | 476 | 11 | 3D POLYMERASE                          |
| 95  | 1tp7 | C | 20.8 | 2.8 | 349 | 460 | 14 | GENOME POLYPROTEIN                     |
| 96  | 5i62 | A | 20.7 | 3.1 | 339 | 507 | 12 | POTENTIAL RNA-DEPENDENT RNA POLYMERASE |
| 97  | 3koa | A | 20.7 | 2.8 | 365 | 476 | 11 | 3D POLYMERASE                          |
| 98  | 4k50 | A | 20.7 | 2.8 | 349 | 460 | 15 | RNA POLYMERASE 3D-POL                  |
| 99  | 4wzq | A | 20.7 | 2.8 | 365 | 476 | 11 | RNA DEPENDENT-RNA POLYMERASE 3D        |
| 100 | 6gvy | A | 20.7 | 2.8 | 365 | 475 | 11 | GENOME POLYPROTEIN                     |
| 101 | 2ec0 | A | 20.7 | 2.8 | 364 | 470 | 11 | 5'-R(P*AP*UP*GP*GP*GP*CP*CP*C)-3'      |
| 102 | 5zit | A | 20.7 | 2.9 | 355 | 456 | 14 | RDRP                                   |
| 103 | 3nai | C | 20.6 | 2.9 | 368 | 486 | 11 | RNA DEPENDENT RNA POLYMERASE           |
| 104 | 5ccv | F | 20.6 | 3.8 | 417 | 851 | 11 | RNA-DIRECTED RNA POLYMERASE NS5        |
| 105 | 5f8n | A | 20.6 | 3   | 354 | 462 | 15 | GENOME POLYPROTEIN                     |
| 106 | 4x2b | A | 20.5 | 2.8 | 364 | 477 | 11 | RNA DEPENDENT RNA POLYMERASE           |
| 107 | 1khw | B | 20.5 | 3.2 | 384 | 497 | 13 | RNA-DIRECTED RNA POLYMERASE            |
| 108 | 4o4r | B | 20.5 | 2.9 | 363 | 480 | 12 | RNA-DEPENDENT-RNA-POLYMERASE           |
| 109 | 4nly | A | 20.5 | 3   | 355 | 461 | 14 | RNA-DIRECTED RNA POLYMERASE 3D-POL     |
| 110 | 4k50 | I | 20.5 | 2.8 | 347 | 460 | 15 | RNA POLYMERASE 3D-POL                  |
| 111 | 5ccv | B | 20.5 | 3.7 | 426 | 852 | 11 | RNA-DIRECTED RNA POLYMERASE NS5        |
| 112 | 5n8x | A | 20.5 | 2.8 | 364 | 475 | 11 | 3D POLYMERASE                          |
| 113 | 4zpb | A | 20.5 | 2.7 | 351 | 462 | 14 | RNA-DIRECTED RNA POLYMERASE            |
| 114 | 4y3c | C | 20.4 | 2.8 | 359 | 460 | 13 | 3D POLYMERASE                          |
| 115 | 3vqs | B | 20.4 | 4   | 366 | 557 | 12 | RNA-DIRECTED RNA POLYMERASE            |
| 116 | 5hmw | A | 20.4 | 3.5 | 399 | 591 | 11 | RNA-DIRECTED RNA POLYMERASE NS5        |

|     |      |   |      |      |     |     |    |                                         |
|-----|------|---|------|------|-----|-----|----|-----------------------------------------|
| 117 | 4k6m | A | 20.3 | 5.4  | 422 | 889 | 13 | POLYPROTEIN                             |
| 118 | 3vqs | D | 20.3 | 4.1  | 369 | 553 | 13 | RNA-DIRECTED RNA POLYMERASE             |
| 119 | 6mvo | A | 20.3 | 4    | 351 | 562 | 15 | RNA-DIRECTED RNA POLYMERASE             |
| 120 | 6i7p | E | 20.3 | 13.1 | 435 | 884 | 12 | NS5                                     |
| 121 | 3ol9 | A | 20.2 | 2.9  | 355 | 461 | 14 | POLYMERASE                              |
| 122 | 3qgd | A | 20.2 | 4    | 350 | 538 | 13 | RNA-DIRECTED RNA POLYMERASE             |
| 123 | 3qgf | A | 20.2 | 4.1  | 354 | 534 | 13 | RNA-DIRECTED RNA POLYMERASE             |
| 124 | 2fvc | A | 20.2 | 3.8  | 350 | 563 | 13 | POLYPROTEIN                             |
| 125 | 4y2c | A | 20.2 | 3    | 360 | 460 | 12 | GENOME POLYPROTEIN                      |
| 126 | 6izz | A | 20.2 | 3.5  | 402 | 568 | 10 | GENOME POLYPROTEIN                      |
| 127 | 3gnw | B | 20.1 | 4    | 364 | 568 | 12 | RNA-DIRECTED RNA POLYMERASE             |
| 128 | 4aex | A | 20.1 | 4.1  | 364 | 563 | 12 | RNA-DIRECTED RNA POLYMERASE             |
| 129 | 3qge | A | 20.1 | 4.2  | 353 | 541 | 13 | RNA-DIRECTED RNA POLYMERASE             |
| 130 | 3h98 | A | 20.1 | 3.8  | 355 | 551 | 12 | RNA-DIRECTED RNA POLYMERASE             |
| 131 | 4aep | A | 20.1 | 4.1  | 364 | 563 | 12 | RNA-DIRECTED RNA POLYMERASE             |
| 132 | 1yuy | A | 20.1 | 4    | 364 | 558 | 12 | RNA-DEPENDENT RNA POLYMERASE            |
| 133 | 3i5k | A | 20.1 | 4    | 351 | 566 | 13 | RNA-DIRECTED RNA POLYMERASE             |
| 134 | 1gx5 | A | 20.1 | 4    | 367 | 530 | 12 | RNA-DIRECTED RNA POLYMERASE             |
| 135 | 4k4s | A | 20.1 | 3    | 358 | 462 | 14 | RNA-DIRECTED RNA POLYMERASE 3D-POL      |
| 136 | 3gnv | A | 20   | 4    | 364 | 563 | 12 | RNA-DIRECTED RNA POLYMERASE             |
| 137 | 3frz | A | 20   | 4.1  | 364 | 562 | 12 | RNA-DIRECTED RNA POLYMERASE             |
| 138 | 3u4o | A | 20   | 4    | 363 | 563 | 12 | RNA-DIRECTED RNA POLYMERASE             |
| 139 | 3ol6 | E | 20   | 3    | 356 | 461 | 15 | POLYMERASE                              |
| 140 | 3qgd | B | 20   | 3.9  | 351 | 515 | 13 | RNA-DIRECTED RNA POLYMERASE             |
| 141 | 1csj | B | 20   | 3.9  | 363 | 531 | 12 | HEPATITIS C VIRUS RNA POLYMERASE (NS5B) |
| 142 | 1csj | A | 20   | 3.9  | 364 | 531 | 12 | HEPATITIS C VIRUS RNA POLYMERASE (NS5B) |
| 143 | 3qgf | B | 20   | 4.2  | 354 | 533 | 13 | RNA-DIRECTED RNA POLYMERASE             |
| 144 | 2ax1 | A | 20   | 4    | 365 | 554 | 12 | GENOME POLYPROTEIN                      |
| 145 | 5trj | A | 20   | 4.2  | 354 | 551 | 13 | RNA-DEPENDENT RNA POLYMERASE            |
| 146 | 2ax1 | B | 20   | 4    | 365 | 561 | 13 | GENOME POLYPROTEIN                      |
| 147 | 4oow | A | 19.9 | 4    | 365 | 555 | 12 | RNA-DIRECTED RNA POLYMERASE             |
| 148 | 2zku | C | 19.9 | 4    | 367 | 563 | 12 | GENOME POLYPROTEIN                      |
| 149 | 4nru | D | 19.9 | 2.9  | 364 | 479 | 11 | RNA DEPENDENT RNA POLYMERASE            |
| 150 | 1os5 | A | 19.9 | 3.9  | 361 | 563 | 12 | HEPATITIS C VIRUS NS5B RNA POLYMERASE   |
| 151 | 3hhk | B | 19.9 | 4    | 360 | 563 | 12 | HCV NS5 POLYMERASE                      |
| 152 | 3olb | E | 19.9 | 3    | 356 | 461 | 15 | POLYMERASE                              |
| 153 | 3tyv | A | 19.9 | 3.9  | 352 | 563 | 14 | RNA-DIRECTED RNA POLYMERASE             |
| 154 | 1gx6 | A | 19.9 | 4    | 368 | 531 | 12 | RNA-DIRECTED RNA POLYMERASE             |

|     |      |   |      |     |     |     |    |                                          |
|-----|------|---|------|-----|-----|-----|----|------------------------------------------|
| 155 | 2dxs | A | 19.9 | 4   | 354 | 517 | 13 | GENOME POLYPROTEIN                       |
| 156 | 2o5d | B | 19.9 | 3.9 | 363 | 561 | 12 | HCV                                      |
| 157 | 3bsa | B | 19.9 | 3.8 | 356 | 557 | 12 | RNA-DIRECTED RNA POLYMERASE              |
| 158 | 2ax0 | A | 19.9 | 4   | 365 | 554 | 12 | GENOME POLYPROTEIN                       |
| 159 | 5y3d | D | 19.9 | 2.9 | 364 | 479 | 11 | RNA-DEPENDENT RNA POLYMERASE             |
| 160 | 1yvx | A | 19.9 | 3.9 | 362 | 548 | 12 | RNA DEPENDENT RNA POLYMERASE             |
| 161 | 4y3c | A | 19.8 | 2.9 | 362 | 460 | 12 | 3D POLYMERASE                            |
| 162 | 3qge | B | 19.8 | 4.1 | 355 | 531 | 12 | RNA-DIRECTED RNA POLYMERASE              |
| 163 | 2xi2 | A | 19.8 | 4   | 351 | 562 | 13 | RNA-DIRECTED RNA POLYMERASE              |
| 164 | 2wrm | A | 19.8 | 3.8 | 363 | 531 | 12 | RNA-DIRECTED RNA POLYMERASE              |
| 165 | 4nlo | A | 19.8 | 3   | 357 | 461 | 15 | RNA-DIRECTED RNA POLYMERASE 3D-POL       |
| 166 | 4k4z | A | 19.8 | 2.8 | 351 | 462 | 15 | RNA-DEPENDENT RNA POLYMERASE             |
| 167 | 4eaw | B | 19.8 | 4   | 366 | 559 | 12 | RNA-DIRECTED RNA POLYMERASE              |
| 168 | 5hmz | A | 19.8 | 3.5 | 400 | 585 | 11 | RNA-DIRECTED RNA POLYMERASE NS5          |
| 169 | 2dxs | B | 19.8 | 4.1 | 355 | 517 | 12 | GENOME POLYPROTEIN                       |
| 170 | 1khw | A | 19.8 | 3.1 | 383 | 493 | 13 | RNA-DIRECTED RNA POLYMERASE              |
| 171 | 5twm | A | 19.8 | 3.9 | 342 | 550 | 14 | NS5B RNA- DEPENDENT RNA POLYMERASE       |
| 172 | 4nru | B | 19.7 | 2.9 | 365 | 482 | 11 | RNA DEPENDENT RNA POLYMERASE             |
| 173 | 3skh | A | 19.7 | 4   | 363 | 558 | 12 | HCV NS5B RNA_DEPENDENT RNA POLYMERASE    |
| 174 | 3cde | A | 19.7 | 3.9 | 361 | 557 | 12 | RNA-DIRECTED RNA POLYMERASE              |
| 175 | 3u4o | B | 19.7 | 3.9 | 359 | 558 | 12 | RNA-DIRECTED RNA POLYMERASE              |
| 176 | 3hky | B | 19.7 | 3.9 | 363 | 560 | 12 | RNA-DIRECTED RNA POLYMERASE              |
| 177 | 3upi | B | 19.7 | 3.9 | 349 | 558 | 13 | RNA-DIRECTED RNA POLYMERASE              |
| 178 | 3i5k | D | 19.7 | 4   | 351 | 566 | 13 | RNA-DIRECTED RNA POLYMERASE              |
| 179 | 3q0z | B | 19.7 | 3.9 | 342 | 545 | 14 | RNA-DIRECTED RNA POLYMERASE              |
| 180 | 4wtd | A | 19.7 | 3.6 | 366 | 534 | 12 | RNA PRIMER TEMPLATE AUAAAUUU             |
| 181 | 4k50 | E | 19.7 | 2.8 | 346 | 460 | 15 | RNA POLYMERASE 3D-POL                    |
| 182 | 1nhv | B | 19.7 | 3.9 | 363 | 561 | 12 |                                          |
| 183 | 3cj4 | A | 19.7 | 4   | 364 | 558 | 12 | RNA-DIRECTED RNA POLYMERASE              |
| 184 | 5tri | B | 19.7 | 4.1 | 355 | 545 | 13 | NS5B RNA-DEPENDENT RNA POLYMERASE        |
| 185 | 2i1r | B | 19.7 | 3.9 | 361 | 561 | 12 | RNA-DIRECTED RNA POLYMERASE (NS5B) (P68) |
| 186 | 5y3d | A | 19.7 | 2.9 | 364 | 479 | 11 | RNA-DEPENDENT RNA POLYMERASE             |
| 187 | 5f8g | A | 19.7 | 3.1 | 357 | 462 | 15 | GENOME POLYPROTEIN                       |
| 188 | 3i5k | B | 19.6 | 4   | 364 | 566 | 12 | RNA-DIRECTED RNA POLYMERASE              |
| 189 | 2xi2 | C | 19.6 | 4   | 363 | 561 | 13 | RNA-DIRECTED RNA POLYMERASE              |
| 190 | 3u4r | B | 19.6 | 3.9 | 359 | 558 | 12 | RNA-DIRECTED RNA POLYMERASE              |
| 191 | 4iqx | A | 19.6 | 2.8 | 364 | 476 | 11 | 3D POLYMERASE                            |

|     |      |   |      |      |     |     |    |                                             |
|-----|------|---|------|------|-----|-----|----|---------------------------------------------|
| 192 | 2xi3 | A | 19.6 | 4.1  | 364 | 562 | 13 | RNA-DIRECTED RNA POLYMERASE                 |
| 193 | 4wtk | A | 19.6 | 3.8  | 366 | 553 | 12 | RNA TEMPLATE AGCC                           |
| 194 | 3sfg | C | 19.6 | 2.9  | 366 | 488 | 11 | RNA POLYMERASE                              |
| 195 | 3d5m | A | 19.6 | 3.9  | 361 | 559 | 12 | RNA-DIRECTED RNA POLYMERASE                 |
| 196 | 4y3c | D | 19.6 | 2.9  | 362 | 460 | 12 | 3D POLYMERASE                               |
| 197 | 2xwy | A | 19.6 | 4    | 355 | 507 | 13 | RNA-DIRECTED RNA POLYMERASE                 |
| 198 | 3i5k | C | 19.6 | 4    | 351 | 566 | 13 | RNA-DIRECTED RNA POLYMERASE                 |
| 199 | 6h80 | A | 19.6 | 3.6  | 400 | 558 | 11 | GENOME POLYPROTEIN                          |
| 200 | 2hwi | B | 19.6 | 4    | 363 | 561 | 12 | RNA-DIRECTED RNA POLYMERASE (NS5B)<br>(P68) |
| 201 | 3cj0 | A | 19.6 | 3.8  | 355 | 562 | 12 | RNA-DIRECTED RNA POLYMERASE                 |
| 202 | 5uj2 | A | 19.6 | 3.8  | 364 | 534 | 13 | RNA (5'-R(*AP*UP*AP*AP*AP*UP*UP*U)-3')      |
| 203 | 5trk | B | 19.6 | 4.2  | 358 | 545 | 13 | GENOME POLYPROTEIN                          |
| 204 | 5pzl | B | 19.6 | 4    | 344 | 545 | 14 | RNA-DIRECTED RNA POLYMERASE                 |
| 205 | 5czb | B | 19.6 | 4    | 363 | 557 | 12 | NS5B                                        |
| 206 | 3phe | D | 19.5 | 3.9  | 364 | 558 | 12 | HCV ENCODED NONSTRUCTURAL 5B<br>PROTEIN     |
| 207 | 1u09 | A | 19.5 | 2.8  | 364 | 476 | 11 | POLYPROTEIN                                 |
| 208 | 3kmq | A | 19.5 | 2.8  | 365 | 476 | 11 | 3D POLYMERASE                               |
| 209 | 4tn2 | A | 19.5 | 4.1  | 364 | 561 | 12 | GENOME POLYPROTEIN                          |
| 210 | 4mkb | A | 19.5 | 3.9  | 362 | 557 | 12 | RNA-DIRECTED RNA POLYMERASE                 |
| 211 | 4nz0 | A | 19.5 | 2.9  | 363 | 460 | 12 | GENOME POLYPROTEIN                          |
| 212 | 3nky | A | 19.5 | 2.8  | 365 | 476 | 11 | 3D POLYMERASE                               |
| 213 | 3kna | A | 19.5 | 2.8  | 365 | 476 | 11 | 3D POLYMERASE                               |
| 214 | 3ska | B | 19.5 | 4    | 362 | 558 | 12 | HCV NS5B RNA_DEPENDENT RNA<br>POLYMERASE    |
| 215 | 2hai | A | 19.5 | 4    | 364 | 562 | 12 | HEPATITIS C VIRUS NS5B RNA<br>POLYMERASE    |
| 216 | 5tfr | B | 19.5 | 12.5 | 433 | 883 | 10 | GENOME POLYPROTEIN                          |
| 217 | 2ec0 | D | 19.5 | 2.8  | 365 | 470 | 11 | 5'-R(P*AP*UP*GP*GP*GP*CP*CP*C)-3'           |
| 218 | 2wcx | A | 19.4 | 3.9  | 356 | 512 | 13 | RNA-DIRECTED RNA POLYMERASE                 |
| 219 | 4kb7 | B | 19.4 | 4    | 362 | 548 | 12 | HCV POLYMERASE                              |
| 220 | 4tlr | A | 19.4 | 4.1  | 364 | 564 | 12 | NS5B                                        |
| 221 | 4nz0 | D | 19.4 | 2.8  | 360 | 460 | 11 | GENOME POLYPROTEIN                          |
| 222 | 4k4x | I | 19.4 | 2.8  | 350 | 463 | 15 | RNA-DEPENDENT RNA POLYMERASE                |
| 223 | 2xym | A | 19.4 | 3.9  | 353 | 563 | 12 | RNA-DIRECTED RNA POLYMERASE                 |
| 224 | 2e9t | D | 19.4 | 2.8  | 364 | 474 | 11 | 5'-R(P*UP*AP*GP*GP*GP*CP*CP*C)-3'           |
| 225 | 4dru | B | 19.4 | 4.1  | 363 | 559 | 12 | RNA-DIRECTED RNA POLYMERASE                 |
| 226 | 4ke5 | A | 19.4 | 4    | 364 | 548 | 12 | HCV POLYMERASE                              |
| 227 | 3sfu | A | 19.4 | 3    | 366 | 480 | 11 | RNA POLYMERASE                              |
| 228 | 4wzm | A | 19.4 | 2.8  | 365 | 475 | 11 | RNA DEPENDENT RNA POLYMERASE                |
| 229 | 2ax0 | B | 19.4 | 4    | 365 | 557 | 12 | GENOME POLYPROTEIN                          |

|     |      |   |      |     |     |     |    |                                             |
|-----|------|---|------|-----|-----|-----|----|---------------------------------------------|
| 230 | 5xe0 | A | 19.4 | 2.9 | 354 | 457 | 14 | GENOME POLYPROTEIN                          |
| 231 | 6ae4 | A | 19.4 | 3.5 | 423 | 637 | 13 | RDRP CATALYTIC                              |
| 232 | 2jc0 | A | 19.4 | 3.9 | 362 | 557 | 12 | RNA-DEPENDENT RNA-POLYMERASE                |
| 233 | 2jc0 | B | 19.4 | 3.9 | 360 | 555 | 12 | RNA-DEPENDENT RNA-POLYMERASE                |
| 234 | 2hwh | A | 19.4 | 3.9 | 363 | 559 | 12 | RNA-DIRECTED RNA POLYMERASE (NS5B)<br>(P68) |
| 235 | 2f8e | X | 19.4 | 2.8 | 364 | 474 | 11 | RNA-DPENDENT RNA POLYMERASE                 |
| 236 | 4zp6 | A | 19.4 | 2.7 | 347 | 454 | 14 | GENOME POLYPROTEIN                          |
| 237 | 5jjs | A | 19.4 | 3.7 | 413 | 850 | 11 | GENOME POLYPROTEIN                          |
| 238 | 1s48 | A | 19.3 | 3.2 | 362 | 588 | 12 | RNA-DEPENDENT RNA POLYMERASE                |
| 239 | 4mkb | B | 19.3 | 3.9 | 363 | 557 | 12 | RNA-DIRECTED RNA POLYMERASE                 |
| 240 | 4mia | A | 19.3 | 3.9 | 352 | 546 | 13 | RNA-DIRECTED RNA POLYMERASE                 |
| 241 | 4j02 | A | 19.3 | 3.9 | 363 | 559 | 12 | GENOME POLYPROTEIN                          |
| 242 | 3cvk | A | 19.3 | 3.9 | 361 | 557 | 12 | RNA-DIRECTED RNA POLYMERASE                 |
| 243 | 4ry4 | B | 19.3 | 4   | 365 | 565 | 12 | HCV J4 RNA POLYMERASE (NS5B)                |
| 244 | 1s49 | A | 19.3 | 3.2 | 362 | 588 | 12 | RNA-DEPENDENT RNA POLYMERASE                |
| 245 | 4kai | B | 19.3 | 4.1 | 365 | 551 | 12 | HCV POLYMERASE                              |
| 246 | 4ry4 | A | 19.3 | 3.9 | 364 | 566 | 12 | HCV J4 RNA POLYMERASE (NS5B)                |
| 247 | 4ry5 | B | 19.3 | 3.9 | 353 | 565 | 13 | HCV J4 RNA POLYMERASE (NS5B)                |
| 248 | 3ddk | A | 19.3 | 2.7 | 352 | 462 | 14 | RNA POLYMERASE B3 3DPOL                     |
| 249 | 4k6m | B | 19.3 | 10  | 433 | 889 | 13 | POLYPROTEIN                                 |
| 250 | 3ol6 | M | 19.3 | 2.9 | 355 | 461 | 14 | POLYMERASE                                  |
| 251 | 6mvk | B | 19.3 | 4   | 362 | 550 | 12 | HCV POLYMERASE                              |
| 252 | 4zpa | A | 19.3 | 2.7 | 351 | 462 | 15 | RNA-DIRECTED RNA POLYMERASE                 |
| 253 | 5n95 | A | 19.3 | 2.8 | 364 | 476 | 11 | 3D POLYMERASE                               |
| 254 | 5u0c | E | 19.3 | 3.4 | 413 | 622 | 12 | NS5 RNA POLYMERASE DOMAIN                   |
| 255 | 2hwh | B | 19.3 | 4   | 364 | 561 | 12 | RNA-DIRECTED RNA POLYMERASE (NS5B)<br>(P68) |
| 256 | 1yvf | A | 19.3 | 4.1 | 367 | 564 | 12 | HCV NS5B POLYMERASE                         |
| 257 | 2gir | B | 19.3 | 4   | 363 | 557 | 12 | RNA-DIRECTED RNA POLYMERASE                 |
| 258 | 3cj2 | A | 19.3 | 3.9 | 356 | 557 | 12 | RNA-DIRECTED RNA POLYMERASE                 |
| 259 | 1xr6 | A | 19.3 | 2.7 | 348 | 460 | 15 | GENOME POLYPROTEIN                          |
| 260 | 4zp7 | A | 19.3 | 2.6 | 348 | 456 | 15 | GENOME POLYPROTEIN                          |
| 261 | 5jjr | A | 19.3 | 3.6 | 412 | 846 | 10 | GENOME POLYPROTEIN                          |
| 262 | 4zpd | A | 19.3 | 2.8 | 355 | 462 | 14 | RNA-DIRECTED RNA POLYMERASE                 |
| 263 | 2zku | A | 19.2 | 4   | 365 | 562 | 12 | GENOME POLYPROTEIN                          |
| 264 | 4wfs | A | 19.2 | 2.6 | 350 | 462 | 15 | RNA-DIRECTED RNA POLYMERASE                 |
| 265 | 4wyl | A | 19.2 | 2.8 | 364 | 478 | 11 | RNA-DIRECTED RNA POLYMERASE 3D-<br>POL      |
| 266 | 3hhk | A | 19.2 | 4   | 363 | 563 | 12 | HCV NS5 POLYMERASE                          |
| 267 | 4khm | A | 19.2 | 4   | 352 | 562 | 14 | HCV POLYMERASE                              |
| 268 | 4nz0 | B | 19.2 | 2.8 | 359 | 460 | 12 | GENOME POLYPROTEIN                          |

|     |      |   |      |     |     |     |    |                                     |
|-----|------|---|------|-----|-----|-----|----|-------------------------------------|
| 269 | 2who | B | 19.2 | 3.9 | 363 | 531 | 12 | RNA-DIRECTED RNA POLYMERASE         |
| 270 | 4khr | B | 19.2 | 4.2 | 368 | 562 | 13 | NS5B RNA-DEPENDENT RNA POLYMERASE   |
| 271 | 2xxd | A | 19.2 | 4   | 353 | 563 | 12 | RNA-DIRECTED RNA POLYMERASE         |
| 272 | 5wz3 | A | 19.2 | 3.6 | 395 | 565 | 12 | NS5 RDRP                            |
| 273 | 2xhw | A | 19.2 | 4.1 | 365 | 560 | 12 | RNA-DIRECTED RNA POLYMERASE         |
| 274 | 4y3c | E | 19.2 | 2.8 | 362 | 460 | 12 | 3D POLYMERASE                       |
| 275 | 4y3c | F | 19.2 | 2.9 | 362 | 460 | 13 | 3D POLYMERASE                       |
| 276 | 2e9r | X | 19.2 | 2.8 | 366 | 475 | 11 | 5'-R(*CP*AP*UP*GP*GP*GP*CP*CP*C)-3' |
| 277 | 5ziu | A | 19.2 | 2.9 | 355 | 457 | 14 | RDRP                                |
| 278 | 1z4u | A | 19.2 | 4   | 364 | 564 | 12 | HCV NS5B POLYMERASE                 |
| 279 | 3cj5 | B | 19.2 | 4.1 | 362 | 563 | 12 | RNA-DIRECTED RNA POLYMERASE         |
| 280 | 2gc8 | B | 19.2 | 4   | 362 | 555 | 12 | RNA-DIRECTED RNA POLYMERASE         |
| 281 | 2qe5 | B | 19.2 | 3.9 | 362 | 559 | 12 | RNA-DIRECTED RNA POLYMERASE         |
| 282 | 2ijn | A | 19.2 | 4   | 363 | 559 | 12 | RNA POLYMERASE NS5B                 |
| 283 | 4zpc | A | 19.2 | 2.7 | 351 | 462 | 15 | RNA-DEPENDENT RNA POLYMERASE        |
| 284 | 4zp9 | A | 19.2 | 2.7 | 349 | 462 | 15 | RNA-DEPENDENT RNA POLYMERASE        |
| 285 | 4ju2 | B | 19.1 | 4   | 362 | 560 | 12 | GENOME POLYPROTEIN                  |
| 286 | 4k4y | A | 19.1 | 2.8 | 352 | 463 | 14 | RNA-DEPENDENT RNA POLYMERASE        |
| 287 | 4y3c | B | 19.1 | 2.8 | 362 | 460 | 12 | 3D POLYMERASE                       |
| 288 | 3mww | B | 19.1 | 4   | 356 | 541 | 13 | GENOME POLYPROTEIN                  |
| 289 | 4k4z | I | 19.1 | 2.8 | 351 | 462 | 14 | RNA-DEPENDENT RNA POLYMERASE        |
| 290 | 3qgg | A | 19.1 | 4.2 | 355 | 531 | 13 | RNA-DIRECTED RNA POLYMERASE         |
| 291 | 3g86 | B | 19.1 | 4   | 364 | 558 | 12 | RNA-DIRECTED RNA POLYMERASE         |
| 292 | 4k4y | M | 19.1 | 2.8 | 351 | 463 | 15 | RNA-DEPENDENT RNA POLYMERASE        |
| 293 | 3cdw | A | 19.1 | 2.7 | 352 | 468 | 14 | RNA-DIRECTED RNA POLYMERASE 3D-POL  |
| 294 | 4k4z | M | 19.1 | 2.8 | 351 | 462 | 15 | RNA-DEPENDENT RNA POLYMERASE        |
| 295 | 3h59 | B | 19.1 | 4   | 351 | 557 | 13 | RNA-DIRECTED RNA POLYMERASE         |
| 296 | 4k4x | M | 19.1 | 2.8 | 351 | 463 | 15 | RNA-DEPENDENT RNA POLYMERASE        |
| 297 | 3cdu | A | 19.1 | 2.7 | 352 | 468 | 14 | RNA-DIRECTED RNA POLYMERASE 3D-POL  |
| 298 | 4k4x | A | 19.1 | 2.8 | 351 | 463 | 15 | RNA-DEPENDENT RNA POLYMERASE        |
| 299 | 3hvo | B | 19.1 | 4.1 | 364 | 557 | 12 | GENOME POLYPROTEIN                  |
| 300 | 4k4z | E | 19.1 | 2.9 | 352 | 462 | 14 | RNA-DEPENDENT RNA POLYMERASE        |
| 301 | 4nlp | A | 19.1 | 2.9 | 353 | 461 | 15 | RNA-DIRECTED RNA POLYMERASE 3D-POL  |
| 302 | 4k4x | E | 19.1 | 2.9 | 355 | 463 | 14 | RNA-DEPENDENT RNA POLYMERASE        |
| 303 | 4y34 | A | 19.1 | 2.9 | 355 | 467 | 14 | 3D POLYMERASE                       |
| 304 | 2e9z | A | 19.1 | 2.7 | 362 | 476 | 11 | 5'-R(*CP*AP*UP*GP*GP*GP*CP*CP*C)-3' |
| 305 | 6rli | B | 19.1 | 2.9 | 363 | 468 | 13 | GENOME POLYPROTEIN                  |
| 306 | 5u0c | C | 19.1 | 3.5 | 410 | 621 | 12 | NS5 RNA POLYMERASE DOMAIN           |



|     |          |   |      |     |     |     |    |                                           |
|-----|----------|---|------|-----|-----|-----|----|-------------------------------------------|
| 307 | 4wtl     | A | 19   | 3.8 | 365 | 553 | 12 | RNA TEMPLATE UACC                         |
| 308 | 1quv     | A | 19   | 4.1 | 365 | 553 | 13 | PROTEIN (RNA-DIRECTED RNA POLYMERASE)     |
| 309 | 3lkh     | A | 19   | 4   | 363 | 554 | 12 | RNA-DIRECTED RNA POLYMERASE               |
| 310 | 4nyz     | A | 19   | 3   | 362 | 461 | 12 | GENOME POLYPROTEIN                        |
| 311 | 4k4y     | E | 19   | 2.8 | 351 | 463 | 14 | RNA-DEPENDENT RNA POLYMERASE              |
| 312 | 4y2a     | A | 19   | 2.7 | 352 | 466 | 14 | 3D POLYMERASE                             |
| 313 | 1nhu     | A | 19   | 3.7 | 353 | 558 | 12 |                                           |
| 314 | 3olb     | M | 19   | 3   | 356 | 461 | 15 | POLYMERASE                                |
| 315 | 2im1     | A | 19   | 2.9 | 358 | 461 | 15 | POLIOVIRUS POLYMERASE                     |
| 316 | 1s4f     | D | 19   | 3.5 | 364 | 575 | 12 | RNA-DEPENDENT RNA POLYMERASE              |
| 317 | 2zku     | D | 19   | 4   | 367 | 558 | 12 | GENOME POLYPROTEIN                        |
| 318 | 4k4y     | I | 19   | 2.8 | 351 | 463 | 14 | RNA-DEPENDENT RNA POLYMERASE              |
| 319 | 2who     | A | 19   | 3.9 | 364 | 531 | 12 | RNA-DIRECTED RNA POLYMERASE               |
| 320 | 4k4s     | E | 19   | 3   | 357 | 462 | 14 | RNA-DIRECTED RNA POLYMERASE 3D-POL        |
| 321 | 3h5u     | A | 19   | 3.9 | 351 | 559 | 13 | RNA-DIRECTED RNA POLYMERASE               |
| 322 | 3vqs     | A | 19   | 4   | 364 | 553 | 13 | RNA-DIRECTED RNA POLYMERASE               |
| 323 | 5m2z     | F | 19   | 13  | 440 | 884 | 11 | NS5                                       |
| 324 | 2awz     | B | 19   | 4   | 365 | 562 | 13 | GENOME POLYPROTEIN                        |
| 325 | 1nb6     | B | 19   | 3.9 | 351 | 565 | 13 | POLYPROTEIN                               |
| 326 | 5i61     | A | 18.9 | 3   | 338 | 523 | 12 | POTENTIAL RNA-DEPENDENT RNA POLYMERASE    |
| 327 | 2ijd     | 1 | 18.9 | 5.2 | 382 | 644 | 14 | PICORNAIN 3C, RNA-DIRECTED RNA POLYMERASE |
| 328 | 1sh0     | B | 18.9 | 3   | 369 | 503 | 10 | RNA POLYMERASE                            |
| 329 | 3vqs     | C | 18.9 | 3.9 | 364 | 556 | 12 | RNA-DIRECTED RNA POLYMERASE               |
| 330 | 2ily     | A | 18.9 | 3   | 356 | 461 | 15 | POLIOVIRUS POLYMERASE                     |
| 331 | 4k4v     | A | 18.9 | 2.9 | 358 | 462 | 14 | RNA-DIRECTED RNA POLYMERASE 3D-POL        |
| 332 | 4k4v     | E | 18.9 | 3   | 358 | 462 | 14 | RNA-DIRECTED RNA POLYMERASE 3D-POL        |
| 333 | 3cwj     | B | 18.9 | 3.9 | 363 | 557 | 12 | RNA-DIRECTED RNA POLYMERASE               |
| 334 | 3.00E+51 | B | 18.9 | 4   | 364 | 557 | 12 | RNA-DIRECTED RNA POLYMERASE               |
| 335 | 3ol9     | E | 18.9 | 2.9 | 355 | 461 | 15 | POLYMERASE                                |
| 336 | 3ol6     | A | 18.9 | 3   | 358 | 461 | 15 | POLYMERASE                                |
| 337 | 4nlw     | A | 18.9 | 3   | 356 | 461 | 13 | RNA-DIRECTED RNA POLYMERASE 3D-POL        |
| 338 | 1ra7     | A | 18.9 | 2.9 | 354 | 461 | 14 | GENOME POLYPROTEIN                        |
| 339 | 1tql     | A | 18.9 | 2.9 | 355 | 461 | 14 | RNA-DIRECTED RNA POLYMERASE               |
| 340 | 1ra6     | A | 18.9 | 3   | 356 | 461 | 14 | GENOME POLYPROTEIN                        |
| 341 | 3h59     | A | 18.9 | 4   | 365 | 557 | 12 | RNA-DIRECTED RNA POLYMERASE               |
| 342 | 2ilz     | A | 18.9 | 3   | 357 | 461 | 15 | POLIOVIRUS POLYMERASE                     |

|     |      |   |      |     |     |     |    |                                        |
|-----|------|---|------|-----|-----|-----|----|----------------------------------------|
| 343 | 2im3 | A | 18.9 | 2.9 | 355 | 461 | 15 | POLIOVIRUS POLYMERASE                  |
| 344 | 4j06 | B | 18.9 | 3.9 | 361 | 558 | 12 | GENOME POLYPROTEIN                     |
| 345 | 2jc1 | B | 18.9 | 4   | 363 | 545 | 12 | RNA-DEPENDENT RNA-POLYMERASE           |
| 346 | 6kwr | A | 18.9 | 3   | 351 | 453 | 15 | RNA-DEPENDENT RNA POLYMERASE           |
| 347 | 5f8l | A | 18.9 | 3   | 357 | 462 | 15 | GENOME POLYPROTEIN                     |
| 348 | 4ju1 | B | 18.8 | 4   | 362 | 560 | 12 | GENOME POLYPROTEIN                     |
| 349 | 3ol7 | E | 18.8 | 3   | 356 | 461 | 16 | POLYMERASE                             |
| 350 | 3hkw | B | 18.8 | 4   | 363 | 560 | 12 | NS5B RNA-DEPENDENT RNA<br>POLYMERASE   |
| 351 | 3ol7 | M | 18.8 | 2.9 | 356 | 461 | 14 | POLYMERASE                             |
| 352 | 2ijf | A | 18.8 | 2.9 | 354 | 461 | 14 | RNA-DIRECTED RNA POLYMERASE            |
| 353 | 4ju4 | B | 18.8 | 4   | 364 | 558 | 12 | GENOME POLYPROTEIN                     |
| 354 | 6r1i | A | 18.8 | 3   | 364 | 468 | 14 | GENOME POLYPROTEIN                     |
| 355 | 3ol8 | I | 18.8 | 3   | 358 | 461 | 15 | POLYMERASE                             |
| 356 | 3ol7 | A | 18.8 | 3   | 356 | 461 | 16 | POLYMERASE                             |
| 357 | 3ola | I | 18.8 | 2.9 | 357 | 461 | 15 | POLYMERASE                             |
| 358 | 3ol8 | A | 18.8 | 3   | 356 | 461 | 16 | POLYMERASE                             |
| 359 | 4obc | A | 18.8 | 3.8 | 365 | 554 | 12 | RNA-DIRECTED RNA POLYMERASE            |
| 360 | 4lq3 | A | 18.8 | 2.9 | 366 | 495 | 10 | RNA-DEPENDENT RNA-POLYMERASE           |
| 361 | 3ol7 | I | 18.8 | 2.9 | 357 | 461 | 16 | POLYMERASE                             |
| 362 | 3olb | I | 18.8 | 3   | 357 | 461 | 15 | POLYMERASE                             |
| 363 | 3ol8 | M | 18.8 | 3   | 358 | 461 | 15 | POLYMERASE                             |
| 364 | 3ol8 | E | 18.8 | 3   | 356 | 461 | 15 | POLYMERASE                             |
| 365 | 4k4u | A | 18.8 | 2.9 | 357 | 462 | 15 | RNA-DIRECTED RNA POLYMERASE 3D-<br>POL |
| 366 | 3ol9 | M | 18.8 | 2.9 | 355 | 461 | 15 | POLYMERASE                             |
| 367 | 3ola | A | 18.8 | 3   | 357 | 461 | 15 | POLYMERASE                             |
| 368 | 4k4u | E | 18.8 | 2.9 | 357 | 462 | 15 | RNA-DIRECTED RNA POLYMERASE 3D-<br>POL |
| 369 | 2im2 | A | 18.8 | 2.9 | 354 | 461 | 15 | POLIOVIRUS POLYMERASE                  |
| 370 | 4jvq | B | 18.8 | 4   | 360 | 560 | 12 | GENOME POLYPROTEIN                     |
| 371 | 3ola | E | 18.8 | 3   | 357 | 461 | 15 | POLYMERASE                             |
| 372 | 4nlx | A | 18.8 | 2.9 | 355 | 461 | 14 | RNA-DIRECTED RNA POLYMERASE 3D-<br>POL |
| 373 | 2yoj | B | 18.8 | 4   | 363 | 558 | 12 | RNA-DIRECTED RNA POLYMERASE            |
| 374 | 5ccv | C | 18.8 | 3.5 | 426 | 853 | 11 | RNA-DIRECTED RNA POLYMERASE NS5        |
| 375 | 4v0q | A | 18.8 | 3.6 | 415 | 852 | 11 | NS5 POLYMERASE                         |
| 376 | 3co9 | B | 18.8 | 4   | 363 | 562 | 12 | RNA-DIRECTED RNA POLYMERASE            |
| 377 | 5f8j | A | 18.8 | 3.1 | 357 | 462 | 15 | GENOME POLYPROTEIN                     |
| 378 | 2qe5 | A | 18.8 | 3.9 | 362 | 559 | 12 | RNA-DIRECTED RNA POLYMERASE            |
| 379 | 5u0c | H | 18.8 | 3.5 | 410 | 623 | 11 | NS5 RNA POLYMERASE DOMAIN              |
| 380 | 1xr5 | A | 18.8 | 3   | 355 | 460 | 17 | GENOME POLYPROTEIN                     |

|     |      |   |      |      |     |     |    |                                           |
|-----|------|---|------|------|-----|-----|----|-------------------------------------------|
| 381 | 1nb4 | B | 18.8 | 4    | 363 | 565 | 12 | POLYPROTEIN                               |
| 382 | 5iq6 | A | 18.8 | 3.4  | 396 | 576 | 11 | RNA DEPENDENT RNA POLYMERASE              |
| 383 | 6mvq | B | 18.8 | 4.1  | 364 | 553 | 12 | HCV POLYMERASE                            |
| 384 | 5f8i | A | 18.8 | 2.9  | 354 | 462 | 14 | GENOME POLYPROTEIN                        |
| 385 | 5tmh | A | 18.8 | 12.7 | 431 | 880 | 12 | POLYPROTEIN                               |
| 386 | 6kwq | A | 18.8 | 3    | 356 | 462 | 15 | RNA-DEPENDENT RNA POLYMERASE              |
| 387 | 5tmh | B | 18.8 | 12.7 | 431 | 879 | 12 | POLYPROTEIN                               |
| 388 | 5f8h | A | 18.8 | 3.1  | 356 | 462 | 14 | GENOME POLYPROTEIN                        |
| 389 | 2d3z | B | 18.8 | 4.1  | 364 | 559 | 12 | POLYPROTEIN                               |
| 390 | 4ju2 | A | 18.7 | 3.9  | 363 | 560 | 12 | GENOME POLYPROTEIN                        |
| 391 | 4eo6 | A | 18.7 | 3.9  | 363 | 557 | 12 | RNA-DIRECTED RNA POLYMERASE               |
| 392 | 4ke5 | B | 18.7 | 3.9  | 352 | 547 | 13 | HCV POLYMERASE                            |
| 393 | 5hn0 | A | 18.7 | 3.5  | 400 | 585 | 11 | RNA-DIRECTED RNA POLYMERASE NS5           |
| 394 | 4ry7 | B | 18.7 | 4    | 361 | 565 | 12 | HCV J4 RNA POLYMERASE (NS5B)              |
| 395 | 2xhu | B | 18.7 | 4    | 363 | 563 | 12 | RNA-DIRECTED RNA POLYMERASE               |
| 396 | 3cde | B | 18.7 | 4    | 363 | 557 | 12 | RNA-DIRECTED RNA POLYMERASE               |
| 397 | 4k4w | E | 18.7 | 3    | 357 | 462 | 14 | RNA-DIRECTED RNA POLYMERASE 3D-POL        |
| 398 | 4k4w | A | 18.7 | 3    | 357 | 462 | 14 | RNA-DIRECTED RNA POLYMERASE 3D-POL        |
| 399 | 4nlu | A | 18.7 | 3    | 356 | 461 | 15 | RNA-DIRECTED RNA POLYMERASE 3D-POL        |
| 400 | 5ccv | A | 18.7 | 3.5  | 408 | 850 | 12 | RNA-DIRECTED RNA POLYMERASE NS5           |
| 401 | 3hvo | A | 18.7 | 4.1  | 364 | 557 | 12 | GENOME POLYPROTEIN                        |
| 402 | 5y6z | E | 18.7 | 3    | 356 | 460 | 15 | GENOME POLYPROTEIN                        |
| 403 | 2brk | A | 18.7 | 3.9  | 355 | 512 | 13 | RNA-DIRECTED RNA POLYMERASE               |
| 404 | 3bsa | A | 18.7 | 4    | 362 | 557 | 12 | RNA-DIRECTED RNA POLYMERASE               |
| 405 | 4ika | A | 18.7 | 3    | 353 | 462 | 14 | 3DPOL                                     |
| 406 | 5u0c | D | 18.7 | 3.5  | 410 | 623 | 11 | NS5 RNA POLYMERASE DOMAIN                 |
| 407 | 6qwt | A | 18.6 | 3.3  | 371 | 471 | 12 | GENOME POLYPROTEIN                        |
| 408 | 2ijd | 2 | 18.6 | 3.8  | 376 | 644 | 14 | PICORNAIN 3C, RNA-DIRECTED RNA POLYMERASE |
| 409 | 3cvk | B | 18.6 | 4    | 366 | 557 | 12 | RNA-DIRECTED RNA POLYMERASE               |
| 410 | 5f41 | A | 18.6 | 3.5  | 400 | 585 | 11 | GENOME POLYPROTEIN                        |
| 411 | 2brl | A | 18.6 | 3.9  | 355 | 512 | 12 | RNA-DIRECTED RNA POLYMERASE               |
| 412 | 3cj0 | B | 18.6 | 3.9  | 360 | 562 | 12 | RNA-DIRECTED RNA POLYMERASE               |
| 413 | 6j00 | A | 18.6 | 3.4  | 401 | 575 | 10 | GENOME POLYPROTEIN                        |
| 414 | 6h9r | A | 18.6 | 3.6  | 400 | 558 | 11 | GENOME POLYPROTEIN                        |
| 415 | 2awz | A | 18.6 | 4    | 365 | 557 | 12 | GENOME POLYPROTEIN                        |
| 416 | 6s2l | A | 18.5 | 2.8  | 362 | 476 | 11 | GENOME POLYPROTEIN                        |
| 417 | 3q0z | A | 18.5 | 4.2  | 354 | 551 | 13 | RNA-DIRECTED RNA POLYMERASE               |
| 418 | 1nb4 | A | 18.5 | 4    | 363 | 566 | 12 | POLYPROTEIN                               |

|     |          |   |      |     |     |     |    |                                       |
|-----|----------|---|------|-----|-----|-----|----|---------------------------------------|
| 419 | 4wtf     | A | 18.5 | 3.8 | 364 | 536 | 13 | RNA PRIMER TEMPLATE CAAAAUUU          |
| 420 | 4mia     | B | 18.5 | 3.8 | 354 | 545 | 12 | RNA-DIRECTED RNA POLYMERASE           |
| 421 | 1nb7     | A | 18.5 | 4   | 363 | 566 | 12 | 5'-R(*UP*UP*UP*U)-3'                  |
| 422 | 4wtm     | A | 18.5 | 3.8 | 365 | 553 | 12 | RNA TEMPLATE UAGG                     |
| 423 | 4.00E+76 | A | 18.5 | 3.8 | 364 | 544 | 13 | RNA-DIRECTED RNA POLYMERASE           |
| 424 | 2b43     | A | 18.5 | 3   | 367 | 501 | 10 | NON-STRUCTURAL POLYPROTEIN            |
| 425 | 2qe5     | C | 18.5 | 3.9 | 352 | 559 | 13 | RNA-DIRECTED RNA POLYMERASE           |
| 426 | 2ckw     | A | 18.5 | 3.2 | 373 | 487 | 12 | RNA-DIRECTED RNA POLYMERASE           |
| 427 | 1xr7     | A | 18.5 | 2.7 | 349 | 460 | 15 | GENOME POLYPROTEIN                    |
| 428 | 4wta     | A | 18.4 | 3.8 | 366 | 535 | 12 | RNA PRIMER TEMPLATE CAAAAUUU          |
| 429 | 3gyn     | B | 18.4 | 4   | 363 | 557 | 12 | RNA-DIRECTED RNA POLYMERASE           |
| 430 | 4mib     | B | 18.4 | 4   | 363 | 557 | 12 | RNA-DIRECTED RNA POLYMERASE           |
| 431 | 3mf5     | A | 18.4 | 3.9 | 362 | 557 | 12 | RNA-DIRECTED RNA POLYMERASE           |
| 432 | 4k50     | M | 18.4 | 2.9 | 349 | 460 | 15 | RNA POLYMERASE 3D-POL                 |
| 433 | 4eo8     | A | 18.4 | 4   | 364 | 557 | 12 | RNA-DIRECTED RNA POLYMERASE           |
| 434 | 2uut     | A | 18.4 | 3.1 | 373 | 492 | 12 | RNA-DIRECTED RNA POLYMERASE           |
| 435 | 4nlq     | A | 18.4 | 3   | 356 | 461 | 15 | RNA-DIRECTED RNA POLYMERASE 3D-POL    |
| 436 | 4eaw     | A | 18.4 | 3.8 | 349 | 559 | 13 | RNA-DIRECTED RNA POLYMERASE           |
| 437 | 4iz0     | A | 18.4 | 4   | 363 | 559 | 12 | RNA-DIRECTED RNA POLYMERASE           |
| 438 | 2qe2     | B | 18.4 | 4   | 330 | 523 | 14 | RNA-DIRECTED RNA POLYMERASE           |
| 439 | 2jc1     | A | 18.4 | 4   | 364 | 549 | 12 | RNA-DEPENDENT RNA-POLYMERASE          |
| 440 | 5qj1     | A | 18.4 | 3.9 | 355 | 543 | 12 | RNA-DEPENDENT RNA POLYMERASE          |
| 441 | 5i3q     | A | 18.4 | 3.4 | 399 | 585 | 11 | GENOME POLYPROTEIN                    |
| 442 | 1xr7     | B | 18.4 | 2.8 | 350 | 460 | 15 | GENOME POLYPROTEIN                    |
| 443 | 1tp7     | B | 18.4 | 2.8 | 349 | 460 | 14 | GENOME POLYPROTEIN                    |
| 444 | 5u0c     | B | 18.4 | 3.4 | 413 | 621 | 12 | NS5 RNA POLYMERASE DOMAIN             |
| 445 | 5pzp     | B | 18.4 | 4.1 | 358 | 535 | 13 | RNA-DIRECTED RNA POLYMERASE           |
| 446 | 3d28     | B | 18.3 | 4   | 364 | 557 | 12 | RNA-DIRECTED RNA POLYMERASE           |
| 447 | 3ske     | B | 18.3 | 3.9 | 360 | 558 | 12 | HCV NS5B RNA_DEPENDENT RNA POLYMERASE |
| 448 | 3gsz     | B | 18.3 | 4.1 | 364 | 558 | 12 | RNA-DIRECTED RNA POLYMERASE           |
| 449 | 3h5s     | A | 18.3 | 3.7 | 354 | 557 | 12 | RNA-DIRECTED RNA POLYMERASE           |
| 450 | 4j02     | B | 18.3 | 3.8 | 359 | 558 | 12 | GENOME POLYPROTEIN                    |
| 451 | 3n6n     | A | 18.3 | 3   | 354 | 462 | 14 | RNA-DEPENDENT RNA POLYMERASE          |
| 452 | 4gmc     | B | 18.3 | 4.1 | 358 | 541 | 13 | NS5B POLYMERASE                       |
| 453 | 5ccv     | H | 18.3 | 3.8 | 400 | 767 | 12 | RNA-DIRECTED RNA POLYMERASE NS5       |
| 454 | 4mk9     | A | 18.3 | 3.9 | 360 | 557 | 12 | RNA-DIRECTED RNA POLYMERASE           |
| 455 | 3h5s     | B | 18.3 | 3.9 | 354 | 557 | 14 | RNA-DIRECTED RNA POLYMERASE           |
| 456 | 4ih5     | B | 18.3 | 4   | 363 | 557 | 12 | RNA-DIRECTED RNA POLYMERASE           |
| 457 | 4mz4     | B | 18.3 | 3.9 | 360 | 560 | 12 | RNA-DIRECTED RNA POLYMERASE           |
| 458 | 2wk4     | A | 18.3 | 3.3 | 378 | 499 | 11 | PROTEASE-POLYMERASE P70               |

|     |      |   |      |      |     |     |    |                                          |
|-----|------|---|------|------|-----|-----|----|------------------------------------------|
| 459 | 4ih5 | A | 18.3 | 4    | 363 | 557 | 12 | RNA-DIRECTED RNA POLYMERASE              |
| 460 | 3upi | A | 18.3 | 4    | 363 | 563 | 12 | RNA-DIRECTED RNA POLYMERASE              |
| 461 | 4nlt | A | 18.3 | 3    | 356 | 461 | 14 | RNA-DIRECTED RNA POLYMERASE 3D-POL       |
| 462 | 3bsc | B | 18.3 | 4    | 364 | 557 | 12 | RNA-DIRECTED RNA POLYMERASE              |
| 463 | 2d3u | B | 18.3 | 3.9  | 362 | 559 | 12 | POLYPROTEIN                              |
| 464 | 3cj2 | B | 18.3 | 4    | 363 | 557 | 12 | RNA-DIRECTED RNA POLYMERASE              |
| 465 | 3bsc | A | 18.3 | 4.1  | 364 | 557 | 12 | RNA-DIRECTED RNA POLYMERASE              |
| 466 | 3br9 | B | 18.3 | 3.8  | 361 | 557 | 12 | RNA-DIRECTED RNA POLYMERASE              |
| 467 | 3cj4 | B | 18.3 | 4    | 363 | 558 | 12 | RNA-DIRECTED RNA POLYMERASE              |
| 468 | 5m2z | A | 18.3 | 13.1 | 439 | 883 | 11 | NS5                                      |
| 469 | 2o5d | A | 18.3 | 3.9  | 363 | 559 | 12 | HCV                                      |
| 470 | 2qe5 | D | 18.3 | 4    | 363 | 559 | 12 | RNA-DIRECTED RNA POLYMERASE              |
| 471 | 1tp7 | A | 18.3 | 2.7  | 348 | 460 | 14 | GENOME POLYPROTEIN                       |
| 472 | 2i1r | A | 18.3 | 4    | 363 | 559 | 12 | RNA-DIRECTED RNA POLYMERASE (NS5B) (P68) |
| 473 | 4jty | B | 18.2 | 3.9  | 360 | 560 | 13 | GENOME POLYPROTEIN                       |
| 474 | 3qgg | B | 18.2 | 4.2  | 354 | 536 | 12 | RNA-DIRECTED RNA POLYMERASE              |
| 475 | 4jy0 | B | 18.2 | 3.8  | 359 | 558 | 12 | GENOME POLYPROTEIN                       |
| 476 | 4ih7 | A | 18.2 | 4    | 363 | 557 | 12 | RNA-DIRECTED RNA POLYMERASE              |
| 477 | 3hkw | C | 18.2 | 4    | 360 | 560 | 12 | NS5B RNA-DEPENDENT RNA POLYMERASE        |
| 478 | 4mka | A | 18.2 | 3.8  | 355 | 557 | 12 | RNA-DIRECTED RNA POLYMERASE              |
| 479 | 4mib | A | 18.2 | 4.1  | 364 | 557 | 12 | RNA-DIRECTED RNA POLYMERASE              |
| 480 | 4txs | D | 18.2 | 4    | 362 | 544 | 13 | POLYPROTEIN                              |
| 481 | 4jy0 | A | 18.2 | 3.8  | 362 | 559 | 12 | GENOME POLYPROTEIN                       |
| 482 | 4ty9 | D | 18.2 | 3.9  | 360 | 544 | 13 | POLYPROTEIN                              |
| 483 | 3hky | A | 18.2 | 4    | 364 | 564 | 12 | RNA-DIRECTED RNA POLYMERASE              |
| 484 | 4mtp | C | 18.2 | 3.5  | 396 | 585 | 12 | RNA DEPENDENT RNA POLYMERASE             |
| 485 | 3cwj | A | 18.2 | 4    | 363 | 557 | 12 | RNA-DIRECTED RNA POLYMERASE              |
| 486 | 3qgh | A | 18.2 | 4    | 360 | 559 | 13 | RNA-DIRECTED RNA POLYMERASE              |
| 487 | 4j04 | A | 18.2 | 4    | 363 | 559 | 12 | GENOME POLYPROTEIN                       |
| 488 | 4j06 | A | 18.2 | 4    | 363 | 559 | 12 | GENOME POLYPROTEIN                       |
| 489 | 4j0a | B | 18.2 | 3.9  | 362 | 558 | 12 | GENOME POLYPROTEIN                       |
| 490 | 2xwh | A | 18.2 | 4.1  | 364 | 561 | 11 | RNA DEPENDENT RNA POLYMERASE             |
| 491 | 4nls | A | 18.2 | 3    | 357 | 461 | 15 | RNA-DIRECTED RNA POLYMERASE 3D-POL       |
| 492 | 3fql | A | 18.2 | 3.9  | 350 | 560 | 14 | RNA-DIRECTED RNA POLYMERASE              |
| 493 | 5m2x | A | 18.2 | 3.8  | 420 | 884 | 12 | NS5                                      |
| 494 | 5k5m | A | 18.1 | 3.7  | 403 | 563 | 11 | RNA DEPENDENT RNA POLYMERASE             |
| 495 | 4tyb | C | 18.1 | 4    | 360 | 545 | 13 | POLYPROTEIN                              |
| 496 | 3n6m | A | 18.1 | 3.1  | 354 | 462 | 15 | RNA-DEPENDENT RNA POLYMERASE             |

|     |          |   |      |     |     |     |    |                                         |
|-----|----------|---|------|-----|-----|-----|----|-----------------------------------------|
| 497 | 3u4r     | A | 18.1 | 4   | 363 | 558 | 12 | RNA-DIRECTED RNA POLYMERASE             |
| 498 | 3mwv     | B | 18.1 | 3.9 | 361 | 558 | 12 | GENOME POLYPROTEIN                      |
| 499 | 3gyn     | A | 18.1 | 3.9 | 361 | 557 | 12 | RNA-DIRECTED RNA POLYMERASE             |
| 500 | 4txs     | C | 18.1 | 3.9 | 360 | 544 | 13 | POLYPROTEIN                             |
| 501 | 3udl     | D | 18.1 | 4   | 362 | 555 | 12 | HCV NS5B POLYMERASE                     |
| 502 | 3udl     | A | 18.1 | 3.8 | 361 | 555 | 12 | HCV NS5B POLYMERASE                     |
| 503 | 3.00E+51 | A | 18.1 | 3.9 | 361 | 557 | 12 | RNA-DIRECTED RNA POLYMERASE             |
| 504 | 4jtz     | B | 18.1 | 3.9 | 364 | 560 | 12 | GENOME POLYPROTEIN                      |
| 505 | 4khr     | A | 18.1 | 4.2 | 365 | 562 | 13 | NS5B RNA-DEPENDENT RNA<br>POLYMERASE    |
| 506 | 4ih6     | A | 18.1 | 3.9 | 361 | 557 | 12 | RNA-DIRECTED RNA POLYMERASE             |
| 507 | 4j08     | B | 18.1 | 3.8 | 360 | 558 | 12 | GENOME POLYPROTEIN                      |
| 508 | 3gsz     | A | 18.1 | 4.1 | 365 | 558 | 12 | RNA-DIRECTED RNA POLYMERASE             |
| 509 | 4ty8     | D | 18.1 | 4.1 | 363 | 546 | 13 | POLYPROTEIN                             |
| 510 | 4kai     | A | 18.1 | 3.8 | 352 | 552 | 13 | HCV POLYMERASE                          |
| 511 | 2zku     | B | 18.1 | 4   | 366 | 561 | 12 | GENOME POLYPROTEIN                      |
| 512 | 2xhu     | A | 18.1 | 4   | 362 | 562 | 12 | RNA-DIRECTED RNA POLYMERASE             |
| 513 | 4ju1     | A | 18.1 | 3.9 | 363 | 560 | 12 | GENOME POLYPROTEIN                      |
| 514 | 4jty     | A | 18.1 | 3.8 | 361 | 560 | 12 | GENOME POLYPROTEIN                      |
| 515 | 4txs     | A | 18.1 | 4   | 361 | 544 | 12 | POLYPROTEIN                             |
| 516 | 3h5u     | B | 18.1 | 3.9 | 352 | 559 | 13 | RNA-DIRECTED RNA POLYMERASE             |
| 517 | 4ju3     | B | 18.1 | 3.9 | 358 | 558 | 12 | GENOME POLYPROTEIN                      |
| 518 | 3g86     | A | 18.1 | 4   | 364 | 557 | 12 | RNA-DIRECTED RNA POLYMERASE             |
| 519 | 4iz0     | B | 18.1 | 3.8 | 359 | 558 | 12 | RNA-DIRECTED RNA POLYMERASE             |
| 520 | 3phe     | B | 18.1 | 4   | 364 | 558 | 12 | HCV ENCODED NONSTRUCTURAL 5B<br>PROTEIN |
| 521 | 2d3z     | A | 18.1 | 3.9 | 361 | 560 | 12 | POLYPROTEIN                             |
| 522 | 1tp7     | D | 18.1 | 2.8 | 348 | 460 | 14 | GENOME POLYPROTEIN                      |
| 523 | 2j7w     | A | 18.1 | 3.7 | 396 | 571 | 11 | POLYPROTEIN                             |
| 524 | 5u0c     | F | 18.1 | 3.4 | 411 | 622 | 12 | NS5 RNA POLYMERASE DOMAIN               |
| 525 | 6izx     | A | 18.1 | 3.5 | 407 | 581 | 12 | GENOME POLYPROTEIN                      |
| 526 | 4mk8     | A | 18   | 3.8 | 355 | 557 | 12 | RNA-DIRECTED RNA POLYMERASE             |
| 527 | 3udl     | B | 18   | 3.9 | 362 | 555 | 12 | HCV NS5B POLYMERASE                     |
| 528 | 4tya     | A | 18   | 4   | 362 | 544 | 12 | POLYPROTEIN                             |
| 529 | 3mf5     | B | 18   | 4.1 | 365 | 557 | 12 | RNA-DIRECTED RNA POLYMERASE             |
| 530 | 4j0a     | A | 18   | 4   | 363 | 559 | 12 | GENOME POLYPROTEIN                      |
| 531 | 3fqk     | B | 18   | 3.8 | 355 | 557 | 12 | RNA-DIRECTED RNA POLYMERASE             |
| 532 | 4ry5     | A | 18   | 4   | 363 | 565 | 12 | HCV J4 RNA POLYMERASE (NS5B)            |
| 533 | 4jy1     | A | 18   | 4   | 363 | 559 | 12 | GENOME POLYPROTEIN                      |
| 534 | 4jy1     | B | 18   | 3.9 | 359 | 558 | 12 | GENOME POLYPROTEIN                      |
| 535 | 4oow     | B | 18   | 4   | 356 | 538 | 13 | RNA-DIRECTED RNA POLYMERASE             |
| 536 | 3tyq     | B | 18   | 4   | 362 | 558 | 12 | RNA-DIRECTED RNA POLYMERASE             |

|     |      |   |      |     |     |     |    |                                          |
|-----|------|---|------|-----|-----|-----|----|------------------------------------------|
| 537 | 4kb7 | A | 18   | 3.8 | 350 | 545 | 13 | HCV POLYMERASE                           |
| 538 | 4ih7 | B | 18   | 4   | 363 | 557 | 12 | RNA-DIRECTED RNA POLYMERASE              |
| 539 | 2xhv | A | 18   | 4   | 360 | 563 | 12 | RNA-DIRECTED RNA POLYMERASE              |
| 540 | 4mz4 | A | 18   | 4   | 363 | 563 | 12 | RNA-DIRECTED RNA POLYMERASE              |
| 541 | 3mwv | A | 18   | 4   | 362 | 559 | 12 | GENOME POLYPROTEIN                       |
| 542 | 3cj3 | A | 18   | 3.9 | 361 | 560 | 12 | RNA-DIRECTED RNA POLYMERASE              |
| 543 | 2gc8 | A | 18   | 4.1 | 366 | 557 | 12 | RNA-DIRECTED RNA POLYMERASE              |
| 544 | 3fqk | A | 17.9 | 3.9 | 352 | 557 | 13 | RNA-DIRECTED RNA POLYMERASE              |
| 545 | 4jtz | A | 17.9 | 3.9 | 363 | 560 | 12 | GENOME POLYPROTEIN                       |
| 546 | 3phe | C | 17.9 | 4   | 365 | 558 | 13 | HCV ENCODED NONSTRUCTURAL 5B PROTEIN     |
| 547 | 4jvq | A | 17.9 | 3.9 | 363 | 560 | 12 | GENOME POLYPROTEIN                       |
| 548 | 4ty9 | C | 17.9 | 3.9 | 360 | 544 | 12 | POLYPROTEIN                              |
| 549 | 4ju4 | A | 17.9 | 3.9 | 363 | 559 | 12 | GENOME POLYPROTEIN                       |
| 550 | 4eo6 | B | 17.9 | 4   | 364 | 560 | 12 | RNA-DIRECTED RNA POLYMERASE              |
| 551 | 4wte | A | 17.9 | 3.8 | 366 | 535 | 12 | RNA PRIMER TEMPLATE ACAAUUU              |
| 552 | 3phe | A | 17.9 | 3.9 | 365 | 558 | 12 | HCV ENCODED NONSTRUCTURAL 5B PROTEIN     |
| 553 | 5yf6 | A | 17.9 | 3.3 | 422 | 646 | 13 | RDRP CATALYTIC                           |
| 554 | 3d5m | B | 17.9 | 4   | 365 | 557 | 12 | RNA-DIRECTED RNA POLYMERASE              |
| 555 | 4tya | C | 17.9 | 3.9 | 359 | 544 | 13 | POLYPROTEIN                              |
| 556 | 3ska | A | 17.9 | 3.9 | 352 | 563 | 14 | HCV NS5B RNA_DEPENDENT RNA POLYMERASE    |
| 557 | 4jtw | A | 17.9 | 3.8 | 362 | 560 | 12 | GENOME POLYPROTEIN                       |
| 558 | 3tyq | A | 17.9 | 4   | 363 | 563 | 12 | RNA-DIRECTED RNA POLYMERASE              |
| 559 | 5dto | A | 17.9 | 3.6 | 418 | 853 | 11 | NS5                                      |
| 560 | 4v0r | A | 17.9 | 3.6 | 417 | 853 | 11 | NS5 POLYMERASE                           |
| 561 | 4hhj | A | 17.9 | 3.5 | 399 | 588 | 11 | NON-STRUCTURAL PROTEIN 5                 |
| 562 | 3qgi | A | 17.9 | 4.3 | 367 | 561 | 13 | RNA-DIRECTED RNA POLYMERASE              |
| 563 | 2hwi | A | 17.9 | 4   | 364 | 559 | 12 | RNA-DIRECTED RNA POLYMERASE (NS5B) (P68) |
| 564 | 5trh | A | 17.9 | 4.2 | 354 | 550 | 13 | NS5B RNA-DEPENDENT RNA POLYMERASE        |
| 565 | 6ae7 | A | 17.9 | 5.3 | 405 | 642 | 13 | RDRP CATALYTIC                           |
| 566 | 3ciz | B | 17.9 | 4   | 363 | 563 | 12 | RNA-DIRECTED RNA POLYMERASE              |
| 567 | 1c2p | B | 17.8 | 4   | 364 | 561 | 12 | RNA-DEPENDENT RNA POLYMERASE             |
| 568 | 4j08 | A | 17.8 | 3.8 | 361 | 559 | 12 | GENOME POLYPROTEIN                       |
| 569 | 4dru | A | 17.8 | 4   | 355 | 549 | 12 | RNA-DIRECTED RNA POLYMERASE              |
| 570 | 3skh | B | 17.8 | 4   | 361 | 558 | 12 | HCV NS5B RNA_DEPENDENT RNA POLYMERASE    |
| 571 | 4jtw | B | 17.8 | 4   | 361 | 560 | 12 | GENOME POLYPROTEIN                       |
| 572 | 3udl | C | 17.8 | 3.8 | 360 | 555 | 12 | HCV NS5B POLYMERASE                      |
| 573 | 3vws | A | 17.8 | 3.6 | 409 | 592 | 11 | NON-STRUCTURAL PROTEIN 5                 |

|     |      |   |      |      |     |     |    |                                                     |
|-----|------|---|------|------|-----|-----|----|-----------------------------------------------------|
| 574 | 4c11 | A | 17.8 | 3.5  | 400 | 593 | 11 | DENGUE VIRUS TYPE 3 RNA DEPENDENT<br>RNA POLYMERASE |
| 575 | 3cj5 | A | 17.8 | 3.8  | 355 | 562 | 12 | RNA-DIRECTED RNA POLYMERASE                         |
| 576 | 6mvq | A | 17.8 | 3.9  | 352 | 552 | 13 | HCV POLYMERASE                                      |
| 577 | 3cj3 | B | 17.8 | 4    | 362 | 562 | 12 | RNA-DIRECTED RNA POLYMERASE                         |
| 578 | 4ju3 | A | 17.7 | 4    | 363 | 559 | 12 | GENOME POLYPROTEIN                                  |
| 579 | 3gnv | B | 17.7 | 4.1  | 361 | 553 | 12 | RNA-DIRECTED RNA POLYMERASE                         |
| 580 | 4ry7 | A | 17.7 | 3.9  | 363 | 565 | 12 | HCV J4 RNA POLYMERASE (NS5B)                        |
| 581 | 4jjs | A | 17.7 | 4    | 363 | 559 | 12 | GENOME POLYPROTEIN                                  |
| 582 | 5f3t | A | 17.7 | 3.5  | 400 | 585 | 11 | RNA-DEPENDENT RNA POLYMERASE                        |
| 583 | 2gir | A | 17.7 | 4    | 362 | 557 | 12 | RNA-DIRECTED RNA POLYMERASE                         |
| 584 | 5pzk | A | 17.7 | 3.8  | 341 | 541 | 14 | RNA-DIRECTED RNA POLYMERASE                         |
| 585 | 5u0c | A | 17.7 | 3.4  | 412 | 624 | 12 | NS5 RNA POLYMERASE DOMAIN                           |
| 586 | 5hmx | A | 17.6 | 3.5  | 398 | 590 | 11 | RNA-DIRECTED RNA POLYMERASE NS5                     |
| 587 | 4jju | B | 17.6 | 4    | 362 | 558 | 12 | GENOME POLYPROTEIN                                  |
| 588 | 5f3z | A | 17.6 | 3.5  | 399 | 585 | 11 | GENOME POLYPROTEIN                                  |
| 589 | 4mk7 | A | 17.6 | 4.1  | 365 | 557 | 12 | RNA-DIRECTED RNA POLYMERASE                         |
| 590 | 1rdr | A | 17.6 | 2.7  | 273 | 316 | 14 | POLIOVIRUS 3D POLYMERASE                            |
| 591 | 3ske | A | 17.5 | 3.9  | 352 | 563 | 13 | HCV NS5B RNA_DEPENDENT RNA<br>POLYMERASE            |
| 592 | 4tyb | D | 17.5 | 3.9  | 360 | 545 | 13 | POLYPROTEIN                                         |
| 593 | 3gnw | A | 17.5 | 4    | 363 | 560 | 12 | RNA-DIRECTED RNA POLYMERASE                         |
| 594 | 4j04 | B | 17.5 | 3.9  | 361 | 558 | 12 | GENOME POLYPROTEIN                                  |
| 595 | 4ty8 | A | 17.5 | 3.9  | 360 | 544 | 12 | POLYPROTEIN                                         |
| 596 | 3gol | B | 17.5 | 4    | 350 | 559 | 13 | RNA-DIRECTED RNA POLYMERASE                         |
| 597 | 5tfr | A | 17.4 | 12.7 | 431 | 883 | 12 | GENOME POLYPROTEIN                                  |
| 598 | 4jjs | B | 17.4 | 4    | 364 | 558 | 12 | GENOME POLYPROTEIN                                  |
| 599 | 4mk7 | B | 17.4 | 4    | 365 | 559 | 12 | RNA-DIRECTED RNA POLYMERASE                         |
| 600 | 4ty9 | A | 17.4 | 3.8  | 359 | 544 | 12 | POLYPROTEIN                                         |
| 601 | 4aex | B | 17.4 | 4.1  | 364 | 564 | 12 | RNA-DIRECTED RNA POLYMERASE                         |
| 602 | 4ry6 | B | 17.4 | 4    | 362 | 564 | 12 | HCV J4 RNA POLYMERASE (NS5B)                        |
| 603 | 4mtp | B | 17.4 | 3.5  | 397 | 591 | 12 | RNA DEPENDENT RNA POLYMERASE                        |
| 604 | 4adp | A | 17.4 | 4    | 364 | 564 | 11 | RNA-DIRECTED RNA POLYMERASE                         |
| 605 | 3br9 | A | 17.4 | 3.8  | 351 | 557 | 13 | RNA-DIRECTED RNA POLYMERASE                         |
| 606 | 5pzk | B | 17.4 | 4    | 343 | 542 | 15 | RNA-DIRECTED RNA POLYMERASE                         |
| 607 | 5m2x | F | 17.4 | 13.2 | 434 | 884 | 12 | NS5                                                 |
| 608 | 3cso | A | 17.3 | 4    | 364 | 561 | 12 | RNA-DIRECTED RNA POLYMERASE                         |
| 609 | 3mww | A | 17.3 | 4    | 363 | 559 | 12 | GENOME POLYPROTEIN                                  |
| 610 | 2xhv | B | 17.3 | 4    | 362 | 562 | 12 | RNA-DIRECTED RNA POLYMERASE                         |
| 611 | 4ju7 | B | 17.3 | 4    | 362 | 558 | 12 | GENOME POLYPROTEIN                                  |
| 612 | 4ju6 | B | 17.3 | 4    | 362 | 558 | 12 | GENOME POLYPROTEIN                                  |
| 613 | 6mvo | B | 17.3 | 4.1  | 352 | 562 | 14 | RNA-DIRECTED RNA POLYMERASE                         |



|     |      |   |      |      |     |     |    |                                                  |
|-----|------|---|------|------|-----|-----|----|--------------------------------------------------|
| 614 | 2d4l | B | 17.3 | 3.9  | 362 | 558 | 12 | POLYPROTEIN                                      |
| 615 | 1nb7 | B | 17.3 | 3.9  | 363 | 565 | 12 | 5'-R(*UP*UP*UP*U)-3'                             |
| 616 | 3gol | A | 17.2 | 4.1  | 362 | 557 | 12 | RNA-DIRECTED RNA POLYMERASE                      |
| 617 | 3hkw | A | 17.2 | 4.1  | 364 | 561 | 12 | NS5B RNA-DEPENDENT RNA POLYMERASE                |
| 618 | 3igv | A | 17.2 | 4    | 363 | 557 | 12 | RNA-DIRECTED RNA POLYMERASE                      |
| 619 | 4jju | A | 17.2 | 3.9  | 363 | 559 | 12 | GENOME POLYPROTEIN                               |
| 620 | 6i7p | A | 17.2 | 4    | 422 | 884 | 10 | NS5                                              |
| 621 | 5czb | A | 17.2 | 4    | 361 | 555 | 12 | NS5B                                             |
| 622 | 5u0c | G | 17.2 | 3.5  | 411 | 624 | 12 | NS5 RNA POLYMERASE DOMAIN                        |
| 623 | 4wtc | A | 17.1 | 3.8  | 366 | 534 | 12 | RNA PRIMER TEMPLATE AGAAAUUU                     |
| 624 | 3uph | A | 17.1 | 4    | 363 | 563 | 12 | RNA-DIRECTED RNA POLYMERASE                      |
| 625 | 4khm | B | 17.1 | 3.9  | 350 | 562 | 14 | HCV POLYMERASE                                   |
| 626 | 2xi2 | B | 17.1 | 4    | 363 | 559 | 12 | RNA-DIRECTED RNA POLYMERASE                      |
| 627 | 4mtp | A | 17.1 | 3.6  | 397 | 591 | 12 | RNA DEPENDENT RNA POLYMERASE                     |
| 628 | 4mk8 | B | 17.1 | 3.8  | 361 | 557 | 12 | RNA-DIRECTED RNA POLYMERASE                      |
| 629 | 4nld | A | 17.1 | 3.7  | 340 | 500 | 12 | RNA-DIRECTED RNA POLYMERASE                      |
| 630 | 4hdg | A | 17.1 | 3.6  | 410 | 612 | 12 | POLYPROTEIN                                      |
| 631 | 5ccv | D | 17.1 | 3.5  | 414 | 849 | 11 | RNA-DIRECTED RNA POLYMERASE NS5                  |
| 632 | 4hdh | B | 17.1 | 3.5  | 406 | 613 | 13 | POLYPROTEIN                                      |
| 633 | 5ccv | G | 17.1 | 3.5  | 413 | 848 | 11 | RNA-DIRECTED RNA POLYMERASE NS5                  |
| 634 | 4hdg | B | 17   | 3.6  | 411 | 612 | 12 | POLYPROTEIN                                      |
| 635 | 5tri | A | 16.9 | 4.1  | 354 | 542 | 13 | NS5B RNA-DEPENDENT RNA POLYMERASE                |
| 636 | 5zqk | A | 16.8 | 14   | 434 | 875 | 10 | NON STRUCTURAL PROTEIN 5                         |
| 637 | 2qe2 | A | 16.8 | 3.7  | 330 | 521 | 14 | RNA-DIRECTED RNA POLYMERASE                      |
| 638 | 4kbi | A | 16.7 | 3.9  | 351 | 544 | 13 | HCV POLYMERASE                                   |
| 639 | 5m2z | B | 16.7 | 12.5 | 443 | 883 | 10 | NS5                                              |
| 640 | 1c2p | A | 16.6 | 4    | 363 | 558 | 12 | RNA-DEPENDENT RNA POLYMERASE                     |
| 641 | 4hdh | A | 16.6 | 3.6  | 410 | 613 | 12 | POLYPROTEIN                                      |
| 642 | 3igv | B | 16.5 | 4    | 364 | 557 | 12 | RNA-DIRECTED RNA POLYMERASE                      |
| 643 | 4mk9 | B | 16.4 | 3.9  | 363 | 557 | 12 | RNA-DIRECTED RNA POLYMERASE                      |
| 644 | 4ju7 | A | 16.4 | 4    | 363 | 559 | 12 | GENOME POLYPROTEIN                               |
| 645 | 4ju6 | A | 16.4 | 4    | 363 | 559 | 12 | GENOME POLYPROTEIN                               |
| 646 | 4c11 | B | 16.4 | 3.5  | 403 | 603 | 11 | DENGUE VIRUS TYPE 3 RNA DEPENDENT RNA POLYMERASE |
| 647 | 5pzo | A | 16.4 | 4.1  | 355 | 550 | 13 | RNA-DIRECTED RNA POLYMERASE                      |
| 648 | 6qsn | B | 16.4 | 5    | 415 | 885 | 11 | GENOME POLYPROTEIN                               |
| 649 | 6izy | A | 16.4 | 3.5  | 412 | 586 | 11 | GENOME POLYPROTEIN                               |
| 650 | 5hmy | A | 16.1 | 3.5  | 400 | 591 | 11 | RNA-DIRECTED RNA POLYMERASE NS5                  |
| 651 | 4ty8 | C | 16.1 | 3.8  | 359 | 545 | 12 | POLYPROTEIN                                      |
| 652 | 2hfz | A | 16   | 3.8  | 404 | 608 | 12 | RNA-DIRECTED RNA POLYMERASE(NS5)                 |

|     |          |   |      |      |     |     |    |                                           |
|-----|----------|---|------|------|-----|-----|----|-------------------------------------------|
| 653 | 1nhu     | B | 15.8 | 4    | 364 | 557 | 12 |                                           |
| 654 | 5zqk     | B | 15.7 | 4.9  | 424 | 876 | 11 | NON STRUCTURAL PROTEIN 5                  |
| 655 | 5m2x     | E | 15.7 | 13.2 | 435 | 884 | 12 | NS5                                       |
| 656 | 1raj     | A | 15.6 | 2.6  | 230 | 257 | 15 | GENOME POLYPROTEIN                        |
| 657 | 5m2z     | C | 15.6 | 13.5 | 441 | 884 | 10 | NS5                                       |
| 658 | 5twm     | A | 15.5 | 4.1  | 351 | 559 | 13 | NS5B RNA-DEPENDENT RNA<br>POLYMERASE      |
| 659 | 6mvk     | A | 15.5 | 4    | 363 | 550 | 12 | HCV POLYMERASE                            |
| 660 | 2j7u     | A | 15.4 | 3.5  | 396 | 573 | 10 | RNA DEPENDENT RNA POLYMERASE              |
| 661 | 5i3p     | A | 15.4 | 3.5  | 399 | 585 | 11 | GENOME POLYPROTEIN                        |
| 662 | 2d4l     | A | 15.4 | 3.9  | 363 | 558 | 12 | POLYPROTEIN                               |
| 663 | 3h98     | B | 15.3 | 4    | 362 | 559 | 12 | RNA-DIRECTED RNA POLYMERASE               |
| 664 | 4e7a     | A | 15.3 | 3.8  | 364 | 536 | 13 | 5'-R(*CP*AP*UP*GP*GP*C)-D(P*(DOC))-3'     |
| 665 | 5m2z     | D | 15.2 | 4    | 426 | 883 | 10 | NS5                                       |
| 666 | 4xha     | A | 15.1 | 3.4  | 360 | 663 | 12 | RNA-DEPENDENT RNA POLYMERASE              |
| 667 | 4wtg     | A | 15   | 3.8  | 366 | 535 | 12 | RNA PRIMER TEMPLATE CAAAAUUU              |
| 668 | 5trh     | B | 14.9 | 4    | 350 | 542 | 13 | NS5B RNA-DEPENDENT RNA<br>POLYMERASE      |
| 669 | 6mvp     | A | 14.9 | 3.9  | 353 | 548 | 14 | GENOME POLYPROTEIN                        |
| 670 | 5u0b     | A | 14.9 | 12.7 | 429 | 884 | 10 | GENOME POLYPROTEIN                        |
| 671 | 4.00E+78 | A | 14.8 | 3.7  | 364 | 538 | 13 | 5'-R(*U*AP*CP*CP*GP*(GDO))-3'             |
| 672 | 4wt9     | A | 14.8 | 3.8  | 364 | 544 | 12 | RNA-DIRECTED RNA POLYMERASE               |
| 673 | 6i7p     | D | 14.8 | 13   | 440 | 884 | 10 | NS5                                       |
| 674 | 5i6l     | B | 14.7 | 3.1  | 334 | 510 | 12 | POTENTIAL RNA-DEPENDENT RNA<br>POLYMERASE |
| 675 | 5pzo     | B | 14.7 | 4    | 355 | 529 | 13 | RNA-DIRECTED RNA POLYMERASE               |
| 676 | 4kbi     | B | 14.6 | 4.1  | 366 | 545 | 12 | HCV POLYMERASE                            |
| 677 | 2yoj     | A | 14.5 | 4    | 362 | 563 | 12 | RNA-DIRECTED RNA POLYMERASE               |
| 678 | 4ty8     | B | 14.4 | 4    | 362 | 547 | 12 | POLYPROTEIN                               |
| 679 | 4tyb     | B | 14.4 | 4    | 362 | 544 | 12 | POLYPROTEIN                               |
| 680 | 4txs     | B | 14.4 | 3.9  | 361 | 544 | 12 | POLYPROTEIN                               |
| 681 | 4ih6     | B | 14.4 | 4    | 364 | 557 | 12 | RNA-DIRECTED RNA POLYMERASE               |
| 682 | 4tya     | D | 14.4 | 4    | 360 | 544 | 13 | POLYPROTEIN                               |
| 683 | 3lkh     | B | 14.4 | 3.8  | 362 | 558 | 12 | RNA-DIRECTED RNA POLYMERASE               |
| 684 | 4ty9     | B | 14.4 | 3.9  | 361 | 544 | 12 | POLYPROTEIN                               |
| 685 | 4mka     | B | 14.4 | 4    | 364 | 557 | 12 | RNA-DIRECTED RNA POLYMERASE               |
| 686 | 1nhv     | A | 14.4 | 3.8  | 363 | 558 | 12 |                                           |
| 687 | 5cyr     | A | 14.4 | 3.4  | 359 | 662 | 12 | RNA-DEPENDENT RNA POLYMERASE              |
| 688 | 6mvp     | B | 14.4 | 4.1  | 366 | 550 | 12 | GENOME POLYPROTEIN                        |
| 689 | 3h2l     | B | 14.3 | 4    | 363 | 557 | 12 | NS5B POLYMERASE                           |
| 690 | 4tya     | B | 14.3 | 4.1  | 362 | 544 | 13 | POLYPROTEIN                               |
| 691 | 4wti     | A | 14.3 | 3.8  | 366 | 553 | 12 | RNA TEMPLATE ACGG                         |

|     |      |   |      |     |     |     |    |                                    |
|-----|------|---|------|-----|-----|-----|----|------------------------------------|
| 692 | 3h2l | A | 14.3 | 4   | 363 | 557 | 12 | NS5B POLYMERASE                    |
| 693 | 3uph | B | 14.3 | 3.8 | 359 | 558 | 12 | RNA-DIRECTED RNA POLYMERASE        |
| 694 | 3tyv | B | 14.3 | 3.9 | 359 | 558 | 12 | RNA-DIRECTED RNA POLYMERASE        |
| 695 | 4tyb | A | 14.3 | 3.9 | 359 | 545 | 12 | POLYPROTEIN                        |
| 696 | 5pzn | B | 14.3 | 4   | 354 | 540 | 12 | RNA-DIRECTED RNA POLYMERASE        |
| 697 | 5twm | B | 14.3 | 4.1 | 354 | 536 | 12 | NS5B RNA- DEPENDENT RNA POLYMERASE |
| 698 | 2d3u | A | 14.3 | 3.8 | 362 | 558 | 12 | POLYPROTEIN                        |
| 699 | 2giq | A | 14.3 | 4   | 363 | 557 | 12 | RNA-DIRECTED RNA POLYMERASE        |
| 700 | 4eo8 | B | 14.2 | 3.9 | 361 | 560 | 12 | RNA-DIRECTED RNA POLYMERASE        |
| 701 | 3d28 | A | 14.2 | 4.1 | 363 | 557 | 12 | RNA-DIRECTED RNA POLYMERASE        |
| 702 | 5pzn | A | 14.2 | 4.2 | 355 | 545 | 13 | RNA-DIRECTED RNA POLYMERASE        |
| 703 | 2ijn | B | 14.2 | 4.1 | 364 | 561 | 12 | RNA POLYMERASE NS5B                |
| 704 | 5pzp | A | 14.2 | 4.2 | 355 | 545 | 12 | RNA-DIRECTED RNA POLYMERASE        |
| 705 | 1uvn | C | 14.2 | 4.2 | 343 | 664 | 12 | RNA-DEPENDENT RNA POLYMERASE       |
| 706 | 1yv2 | A | 14.2 | 3.9 | 362 | 548 | 12 | RNA DEPENDENT RNA POLYMERASE       |
| 707 | 5w2e | B | 14.2 | 4   | 362 | 559 | 12 | GENOME POLYPROTEIN                 |
| 708 | 5trj | B | 14.2 | 4.1 | 355 | 543 | 13 | RNA-DEPENDENT RNA POLYMERASE       |
| 709 | 2giq | B | 14.2 | 4   | 364 | 557 | 12 | RNA-DIRECTED RNA POLYMERASE        |
| 710 | 5w2e | A | 14.2 | 4   | 365 | 559 | 12 | GENOME POLYPROTEIN                 |
| 711 | 4ry6 | A | 14.1 | 4   | 363 | 565 | 12 | HCV J4 RNA POLYMERASE (NS5B)       |
| 712 | 3cso | B | 14.1 | 3.9 | 361 | 560 | 12 | RNA-DIRECTED RNA POLYMERASE        |
| 713 | 3ciz | A | 14.1 | 4   | 364 | 562 | 12 | RNA-DIRECTED RNA POLYMERASE        |
| 714 | 4gmc | A | 14.1 | 4   | 363 | 559 | 12 | NS5B POLYMERASE                    |
| 715 | 3co9 | A | 14.1 | 3.9 | 361 | 562 | 12 | RNA-DIRECTED RNA POLYMERASE        |
| 716 | 2fvc | B | 14.1 | 3.9 | 363 | 563 | 12 | POLYPROTEIN                        |
| 717 | 5pzm | B | 14.1 | 4.2 | 355 | 545 | 13 | RNA-DIRECTED RNA POLYMERASE        |
| 718 | 5trk | A | 14.1 | 4.2 | 354 | 551 | 13 | GENOME POLYPROTEIN                 |
| 719 | 1uvn | A | 14.1 | 4.2 | 343 | 664 | 12 | RNA-DEPENDENT RNA POLYMERASE       |
| 720 | 2xi3 | B | 14   | 4.1 | 364 | 562 | 13 | RNA-DIRECTED RNA POLYMERASE        |
| 721 | 1nb6 | A | 14   | 4   | 363 | 566 | 12 | POLYPROTEIN                        |
| 722 | 5pzl | A | 14   | 4.1 | 352 | 551 | 13 | RNA-DIRECTED RNA POLYMERASE        |
| 723 | 5pzm | A | 14   | 4.2 | 354 | 551 | 13 | RNA-DIRECTED RNA POLYMERASE        |
| 724 | 4mtp | D | 13.9 | 3.5 | 377 | 546 | 10 | RNA DEPENDENT RNA POLYMERASE       |
| 725 | 4a8y | C | 13.9 | 4   | 340 | 640 | 12 | RNA-DIRECTED RNA POLYMERASE        |
| 726 | 2jlf | B | 13.9 | 4.1 | 346 | 661 | 12 | RNA-DIRECTED RNA POLYMERASE        |
| 727 | 4b02 | A | 13.8 | 3.9 | 339 | 664 | 11 | RNA-DIRECTED RNA POLYMERASE        |
| 728 | 1uvl | A | 13.8 | 4.2 | 345 | 664 | 12 | RNA-DEPENDENT RNA POLYMERASE       |
| 729 | 1uvl | C | 13.7 | 3.9 | 338 | 664 | 11 | RNA-DEPENDENT RNA POLYMERASE       |
| 730 | 1hi8 | B | 13.7 | 4.1 | 340 | 664 | 11 | P2 PROTEIN                         |
| 731 | 2hcs | A | 13.7 | 3.8 | 346 | 486 | 13 | RNA-DIRECTED RNA POLYMERASE (NS5)  |
| 732 | 1uvl | E | 13.6 | 3.9 | 339 | 664 | 11 | RNA-DEPENDENT RNA POLYMERASE       |

|     |      |   |      |      |     |      |    |                                   |
|-----|------|---|------|------|-----|------|----|-----------------------------------|
| 733 | 4a8w | A | 13.6 | 4.2  | 347 | 664  | 12 | RNA-DIRECTED RNA POLYMERASE       |
| 734 | 5m2x | D | 13.6 | 12.5 | 438 | 884  | 11 | NS5                               |
| 735 | 2hcn | A | 13.5 | 3.8  | 344 | 486  | 12 | RNA-DIRECTED RNA POLYMERASE (NS5) |
| 736 | 4a8s | B | 13.5 | 4.2  | 344 | 664  | 12 | RNA-DIRECTED RNA POLYMERASE       |
| 737 | 1uvi | C | 13.5 | 4.2  | 346 | 664  | 12 | RNA-DEPENDENT RNA POLYMERASE      |
| 738 | 1hhs | A | 13.4 | 4.2  | 345 | 664  | 12 | RNA-DIRECTED RNA POLYMERASE       |
| 739 | 4a8m | R | 13.4 | 4.2  | 347 | 664  | 12 | RNA-DIRECTED RNA POLYMERASE       |
| 740 | 1uvj | A | 13.4 | 4.1  | 344 | 664  | 12 | P2 PROTEIN                        |
| 741 | 4a8s | C | 13.4 | 4.1  | 340 | 646  | 12 | RNA-DIRECTED RNA POLYMERASE       |
| 742 | 4a8k | A | 13.3 | 4.2  | 348 | 664  | 12 | RNA-DIRECTED RNA POLYMERASE       |
| 743 | 4a8k | C | 13.3 | 4.2  | 344 | 664  | 12 | RNA-DIRECTED RNA POLYMERASE       |
| 744 | 5qj0 | A | 13.3 | 3.9  | 349 | 559  | 12 | RNA-DEPENDENT RNA POLYMERASE      |
| 745 | 1hht | Q | 13.3 | 4.1  | 341 | 664  | 12 | P2 PROTEIN                        |
| 746 | 1hht | P | 13.3 | 4.2  | 343 | 664  | 12 | P2 PROTEIN                        |
| 747 | 1hht | R | 13.3 | 4.2  | 344 | 664  | 12 | P2 PROTEIN                        |
| 748 | 2jl9 | A | 13.3 | 4.1  | 343 | 661  | 12 | RNA-DIRECTED RNA POLYMERASE       |
| 749 | 4a8o | A | 13.2 | 4.2  | 348 | 664  | 12 | RNA-DIRECTED RNA POLYMERASE       |
| 750 | 5ccv | E | 13.2 | 3.7  | 430 | 853  | 11 | RNA-DIRECTED RNA POLYMERASE NS5   |
| 751 | 4a8q | C | 13.1 | 4    | 337 | 647  | 12 | RNA-DIRECTED RNA POLYMERASE       |
| 752 | 1hhs | C | 13.1 | 4    | 335 | 664  | 10 | RNA-DIRECTED RNA POLYMERASE       |
| 753 | 1uvm | A | 13.1 | 4    | 339 | 664  | 11 | RNA-DEPENDENT RNA POLYMERASE      |
| 754 | 1uvm | E | 13.1 | 4.2  | 344 | 664  | 12 | RNA-DEPENDENT RNA POLYMERASE      |
| 755 | 4ieg | D | 13.1 | 4    | 324 | 643  | 10 | RNA-DEPENDENT RNA POLYMERASE P2   |
| 756 | 1hhs | B | 13   | 4.1  | 337 | 664  | 12 | RNA-DIRECTED RNA POLYMERASE       |
| 757 | 1wac | C | 13   | 4    | 338 | 662  | 12 | P2 PROTEIN                        |
| 758 | 5m2x | C | 13   | 12.5 | 437 | 884  | 11 | NS5                               |
| 759 | 1wac | A | 13   | 4    | 338 | 662  | 12 | P2 PROTEIN                        |
| 760 | 1wac | B | 13   | 3.9  | 335 | 662  | 12 | P2 PROTEIN                        |
| 761 | 1uvj | B | 13   | 4    | 340 | 664  | 10 | P2 PROTEIN                        |
| 762 | 4xhi | A | 12.9 | 3.4  | 361 | 663  | 12 | RNA-DEPENDENT RNA POLYMERASE      |
| 763 | 1uvm | C | 12.9 | 4.2  | 346 | 664  | 12 | RNA-DEPENDENT RNA POLYMERASE      |
| 764 | 6qpg | H | 12.9 | 4.3  | 310 | 667  | 10 | POLYMERASE ACIDIC PROTEIN         |
| 765 | 5u04 | A | 12.9 | 3.4  | 331 | 478  | 12 | ZIKA VIRUS NS5 RDRP               |
| 766 | 6ty9 | A | 12.8 | 6.5  | 343 | 1208 | 8  | RNA-DEPENDENT RNA POLYMERASE      |
| 767 | 4a8f | C | 12.8 | 4    | 343 | 664  | 11 | RNA-DIRECTED RNA POLYMERASE       |
| 768 | 4xhi | B | 12.8 | 3.4  | 358 | 664  | 12 | RNA-DEPENDENT RNA POLYMERASE      |
| 769 | 5tit | A | 12.8 | 3.4  | 330 | 478  | 12 | ZIKA VIRUS NS5 RDRP               |
| 770 | 4ieg | A | 12.8 | 4.1  | 329 | 649  | 10 | RNA-DEPENDENT RNA POLYMERASE P2   |
| 771 | 4a8m | Q | 12.7 | 4.2  | 345 | 664  | 12 | RNA-DIRECTED RNA POLYMERASE       |
| 772 | 4a8y | B | 12.7 | 4.1  | 340 | 664  | 11 | RNA-DIRECTED RNA POLYMERASE       |
| 773 | 1uvj | C | 12.7 | 4.1  | 343 | 664  | 12 | P2 PROTEIN                        |

|     |      |   |      |      |     |      |    |                                                |
|-----|------|---|------|------|-----|------|----|------------------------------------------------|
| 774 | 6tz0 | A | 12.6 | 6.8  | 344 | 1208 | 8  | RNA-DEPENDENT RNA POLYMERASE                   |
| 775 | 6qnw | B | 12.6 | 4.3  | 306 | 679  | 12 | POLYMERASE ACIDIC PROTEIN                      |
| 776 | 6u1x | A | 12.6 | 4.2  | 338 | 2059 | 7  | RNA-DIRECTED RNA POLYMERASE L                  |
| 777 | 6qnw | E | 12.5 | 4.4  | 307 | 665  | 11 | POLYMERASE ACIDIC PROTEIN                      |
| 778 | 2jl9 | C | 12.5 | 4.1  | 342 | 655  | 12 | RNA-DIRECTED RNA POLYMERASE                    |
| 779 | 4gzk | A | 12.4 | 3.9  | 321 | 650  | 11 | RNA-DEPENDENT RNA POLYMERASE P2                |
| 780 | 5fj6 | A | 12.4 | 4.2  | 337 | 664  | 11 | RNA-DIRECTED RNA POLYMERASE                    |
| 781 | 6qnw | H | 12.3 | 4.3  | 300 | 676  | 10 | POLYMERASE ACIDIC PROTEIN                      |
| 782 | 5u0b | B | 12.2 | 4.9  | 425 | 884  | 12 | GENOME POLYPROTEIN                             |
| 783 | 5cx6 | B | 12.1 | 3.4  | 359 | 665  | 12 | RNA-DEPENDENT RNA POLYMERASE                   |
| 784 | 5cx6 | A | 12.1 | 3.3  | 358 | 663  | 12 | RNA-DEPENDENT RNA POLYMERASE                   |
| 785 | 4xha | B | 12.1 | 3.3  | 360 | 662  | 12 | RNA-DEPENDENT RNA POLYMERASE                   |
| 786 | 6ar3 | A | 12.1 | 4.3  | 294 | 418  | 10 | GSI-IIC RT                                     |
| 787 | 5fj7 | C | 12   | 4.1  | 341 | 664  | 11 | MAJOR INNER PROTEIN P1                         |
| 788 | 5cyr | B | 12   | 3.5  | 360 | 664  | 12 | RNA-DEPENDENT RNA POLYMERASE                   |
| 789 | 6qcv | B | 11.9 | 4.3  | 305 | 746  | 10 | POLYMERASE ACIDIC PROTEIN                      |
| 790 | 6kur | B | 11.9 | 4.2  | 301 | 705  | 13 | POLYMERASE 3                                   |
| 791 | 2r7t | A | 11.8 | 3.8  | 314 | 1073 | 10 | RNA (5'-R(*UP*GP*UP*GP*AP*AP*CP*C)-3')         |
| 792 | 2yi8 | A | 11.8 | 3.4  | 350 | 771  | 11 | RNA-DIRECTED RNA POLYMERASE                    |
| 793 | 6ogz | A | 11.8 | 6.7  | 334 | 1082 | 10 | RNA (5'-                                       |
| 794 | 6qpg | B | 11.8 | 4.4  | 310 | 656  | 9  | POLYMERASE ACIDIC PROTEIN                      |
| 795 | 6kut | B | 11.8 | 4.3  | 307 | 696  | 13 | POLYMERASE 3                                   |
| 796 | 6qcw | B | 11.8 | 4.3  | 309 | 745  | 10 | POLYMERASE ACIDIC PROTEIN                      |
| 797 | 2r7w | A | 11.7 | 3.8  | 314 | 1073 | 10 | RNA (5'-R(*UP*GP*UP*GP*AP*CP*C)-3')            |
| 798 | 6ar3 | D | 11.7 | 4.2  | 285 | 419  | 9  | GSI-IIC RT                                     |
| 799 | 6qpg | E | 11.7 | 4.3  | 311 | 666  | 11 | POLYMERASE ACIDIC PROTEIN                      |
| 800 | 2yi9 | A | 11.7 | 3.4  | 352 | 771  | 10 | RNA-DIRECTED RNA POLYMERASE                    |
| 801 | 5m2x | B | 11.7 | 4.1  | 421 | 883  | 12 | NS5                                            |
| 802 | 6i7p | F | 11.7 | 13.2 | 434 | 884  | 12 | NS5                                            |
| 803 | 4r71 | B | 11.6 | 4.3  | 263 | 556  | 10 | ELONGATION FACTOR TS, ELONGATION FACTOR TU     |
| 804 | 6i7p | B | 11.6 | 13.3 | 441 | 883  | 11 | NS5                                            |
| 805 | 2r7x | B | 11.6 | 6.6  | 320 | 1073 | 10 | RNA (5'-R(*UP*GP*UP*GP*AP*CP*C)-3')            |
| 806 | 6ju2 | B | 11.5 | 4.2  | 307 | 703  | 14 | POLYMERASE 3                                   |
| 807 | 4q7j | C | 11.5 | 4.4  | 279 | 547  | 11 | ELONGATION FACTOR TS                           |
| 808 | 6i7p | C | 11.5 | 12.7 | 437 | 884  | 11 | NS5                                            |
| 809 | 2r72 | A | 11.5 | 3.5  | 352 | 765  | 11 | INFECTIOUS BURSAL DISEASE VIRUS VP1 POLYMERASE |
| 810 | 4wsa | B | 11.5 | 4.1  | 302 | 733  | 11 | INFLUENZA B VRNA PROMOTER 3' END               |
| 811 | 6qct | B | 11.5 | 4.1  | 300 | 735  | 10 | POLYMERASE ACIDIC PROTEIN                      |
| 812 | 6qpf | B | 11.4 | 4.2  | 307 | 685  | 10 | POLYMERASE ACIDIC PROTEIN                      |
| 813 | 6qcs | B | 11.4 | 4.1  | 298 | 750  | 10 | POLYMERASE ACIDIC PROTEIN                      |

|     |      |   |      |      |     |      |    |                                                |
|-----|------|---|------|------|-----|------|----|------------------------------------------------|
| 814 | 4r71 | D | 11.4 | 4.7  | 273 | 553  | 10 | ELONGATION FACTOR TS, ELONGATION FACTOR TU     |
| 815 | 3vnv | A | 11.4 | 4.6  | 272 | 1203 | 10 |                                                |
| 816 | 5m2z | E | 11.4 | 13.1 | 441 | 884  | 11 | NS5                                            |
| 817 | 3avw | A | 11.3 | 4.3  | 269 | 1203 | 10 |                                                |
| 818 | 3agp | A | 11.3 | 5.5  | 271 | 1202 | 10 |                                                |
| 819 | 2yi9 | C | 11.2 | 3.3  | 351 | 771  | 10 | RNA-DIRECTED RNA POLYMERASE                    |
| 820 | 6qsn | A | 11.2 | 5.7  | 421 | 883  | 11 | GENOME POLYPROTEIN                             |
| 821 | 3avt | A | 11.1 | 5.7  | 271 | 1203 | 9  |                                                |
| 822 | 6abe | B | 11.1 | 4.3  | 306 | 702  | 13 | POLYMERASE 3                                   |
| 823 | 5irf | A | 11.1 | 4.1  | 232 | 283  | 8  | RETRON-TYPE REVERSE TRANSCRIPTASE              |
| 824 | 5irf | D | 11.1 | 4.1  | 231 | 290  | 8  | RETRON-TYPE REVERSE TRANSCRIPTASE              |
| 825 | 2qj1 | A | 11.1 | 3.4  | 351 | 767  | 10 | INFECTIOUS BURSAL DISEASE VIRUS VP1 POLYMERASE |
| 826 | 4ieg | C | 11.1 | 4.1  | 327 | 650  | 10 | RNA-DEPENDENT RNA POLYMERASE P2                |
| 827 | 5hhj | B | 11.1 | 4.2  | 232 | 293  | 8  | RETRON-TYPE REVERSE TRANSCRIPTASE              |
| 828 | 3agq | A | 11.1 | 4.6  | 276 | 1199 | 9  |                                                |
| 829 | 5irf | C | 11.1 | 4.1  | 231 | 282  | 8  | RETRON-TYPE REVERSE TRANSCRIPTASE              |
| 830 | 5irg | B | 11.1 | 4.2  | 232 | 288  | 8  | RETRON-TYPE REVERSE TRANSCRIPTASE              |
| 831 | 5fmz | E | 11.1 | 4.3  | 306 | 733  | 11 | POLYMERASE ACIDIC PROTEIN                      |
| 832 | 6v85 | A | 11   | 4.1  | 303 | 1901 | 9  | RNA-DIRECTED RNA POLYMERASE L                  |
| 833 | 5irg | A | 11   | 4.1  | 231 | 286  | 8  | RETRON-TYPE REVERSE TRANSCRIPTASE              |
| 834 | 5irg | D | 11   | 4.2  | 230 | 286  | 8  | RETRON-TYPE REVERSE TRANSCRIPTASE              |
| 835 | 6ueb | A | 11   | 4.1  | 339 | 2099 | 8  | LARGE STRUCTURAL PROTEIN                       |
| 836 | 5irg | C | 11   | 4.2  | 230 | 284  | 8  | RETRON-TYPE REVERSE TRANSCRIPTASE              |
| 837 | 5hhl | G | 11   | 4.3  | 235 | 289  | 9  | RETRON-TYPE REVERSE TRANSCRIPTASE              |
| 838 | 5hhj | A | 11   | 4.1  | 232 | 296  | 8  | RETRON-TYPE REVERSE TRANSCRIPTASE              |
| 839 | 6kuk | B | 11   | 4.2  | 303 | 701  | 13 | POLYMERASE 3                                   |
| 840 | 5hhk | B | 11   | 4.2  | 232 | 292  | 8  | RETRON-TYPE REVERSE TRANSCRIPTASE              |
| 841 | 3vnu | A | 10.9 | 4.6  | 272 | 1203 | 10 |                                                |
| 842 | 4fwf | A | 10.9 | 5.9  | 285 | 1203 | 10 |                                                |
| 843 | 5hhl | B | 10.9 | 4.3  | 234 | 290  | 8  | RETRON-TYPE REVERSE TRANSCRIPTASE              |
| 844 | 5hhk | A | 10.9 | 4.3  | 233 | 294  | 8  | RETRON-TYPE REVERSE TRANSCRIPTASE              |
| 845 | 5hhl | E | 10.9 | 4.2  | 231 | 289  | 9  | RETRON-TYPE REVERSE TRANSCRIPTASE              |
| 846 | 5fmz | B | 10.9 | 4.3  | 303 | 708  | 10 | POLYMERASE ACIDIC PROTEIN                      |
| 847 | 5hhl | A | 10.9 | 4.3  | 236 | 292  | 8  | RETRON-TYPE REVERSE TRANSCRIPTASE              |
| 848 | 5hhl | D | 10.9 | 4.3  | 232 | 289  | 8  | RETRON-TYPE REVERSE TRANSCRIPTASE              |
| 849 | 6j6g | A | 10.9 | 3.9  | 333 | 1913 | 8  | PRE-MRNA-SPLICING FACTOR 8                     |
| 850 | 5hhl | F | 10.8 | 4.4  | 230 | 283  | 8  | RETRON-TYPE REVERSE TRANSCRIPTASE              |
| 851 | 5hhl | C | 10.8 | 4.3  | 231 | 289  | 8  | RETRON-TYPE REVERSE TRANSCRIPTASE              |
| 852 | 5hhl | H | 10.8 | 4.3  | 231 | 287  | 8  | RETRON-TYPE REVERSE TRANSCRIPTASE              |
| 853 | 5m3j | B | 10.8 | 4.3  | 307 | 733  | 10 | POLYMERASE ACIDIC PROTEIN                      |

|     |      |   |      |     |     |      |    |                                                    |
|-----|------|---|------|-----|-----|------|----|----------------------------------------------------|
| 854 | 6evj | B | 10.7 | 4.2 | 307 | 752  | 10 | POLYMERASE ACIDIC PROTEIN                          |
| 855 | 6qpf | H | 10.7 | 4.3 | 304 | 673  | 10 | POLYMERASE ACIDIC PROTEIN                          |
| 856 | 2yib | D | 10.7 | 3.5 | 353 | 761  | 10 | RNA-DIRECTED RNA POLYMERASE                        |
| 857 | 6qpf | E | 10.7 | 4.4 | 306 | 661  | 10 | POLYMERASE ACIDIC PROTEIN                          |
| 858 | 5msg | B | 10.7 | 4.4 | 303 | 746  | 12 | POLYMERASE ACIDIC PROTEIN                          |
| 859 | 6uen | A | 10.6 | 4   | 307 | 1392 | 12 | RNA-DIRECTED RNA POLYMERASE L                      |
| 860 | 2r7u | A | 10.6 | 3.8 | 315 | 1073 | 10 | RNA (5'-R(*AP*A*AP*AP*GP*CP*C)-3')                 |
| 861 | 2yi8 | C | 10.6 | 3.3 | 347 | 771  | 11 | RNA-DIRECTED RNA POLYMERASE                        |
| 862 | 6kuj | B | 10.6 | 4.2 | 306 | 705  | 13 | POLYMERASE 3                                       |
| 863 | 5irf | B | 10.6 | 4.4 | 231 | 287  | 8  | RETRON-TYPE REVERSE TRANSCRIPTASE                  |
| 864 | 3zed | C | 10.5 | 3.4 | 352 | 765  | 11 | RNA-DIRECTED RNA POLYMERASE                        |
| 865 | 6ju3 | B | 10.5 | 4.2 | 300 | 702  | 12 | POLYMERASE 3                                       |
| 866 | 5d98 | B | 10.5 | 4.4 | 298 | 711  | 12 | POLYMERASE ACIDIC PROTEIN                          |
| 867 | 4wrt | B | 10.5 | 4.4 | 306 | 742  | 11 | INFLUENZA VIRUS POLYMERASE VRNA<br>PROMOTER 3' END |
| 868 | 6f5o | B | 10.5 | 4.1 | 301 | 733  | 9  | POLYMERASE ACIDIC PROTEIN                          |
| 869 | 6kv5 | B | 10.5 | 4.3 | 306 | 696  | 12 | POLYMERASE 3                                       |
| 870 | 6qcx | B | 10.5 | 4.3 | 304 | 747  | 10 | POLYMERASE ACIDIC PROTEIN                          |
| 871 | 5lj3 | A | 10.5 | 4   | 338 | 1922 | 7  | U5 SNRNA (SMALL NUCLEAR RNA)                       |
| 872 | 2yi9 | E | 10.4 | 3.4 | 351 | 771  | 10 | RNA-DIRECTED RNA POLYMERASE                        |
| 873 | 2yi8 | E | 10.4 | 3.4 | 351 | 771  | 11 | RNA-DIRECTED RNA POLYMERASE                        |
| 874 | 4q7j | G | 10.4 | 4.6 | 272 | 545  | 11 | ELONGATION FACTOR TS                               |
| 875 | 2yi8 | D | 10.4 | 3.4 | 351 | 771  | 11 | RNA-DIRECTED RNA POLYMERASE                        |
| 876 | 6ar1 | D | 10.4 | 4.3 | 291 | 415  | 10 | GSI-IIC RT                                         |
| 877 | 5a22 | A | 10.3 | 4.2 | 338 | 2002 | 7  | VESICULAR STOMATITIS VIRUS L<br>POLYMERASE         |
| 878 | 4wsb | B | 10.3 | 4.1 | 299 | 745  | 10 | POLYMERASE PA                                      |
| 879 | 1uon | A | 10.3 | 6.6 | 337 | 1264 | 9  | MINOR CORE PROTEIN LAMBDA 3                        |
| 880 | 6ogy | A | 10.3 | 7.3 | 325 | 1053 | 8  | RNA-DEPENDENT RNA POLYMERASE OF<br>ROTAVIRUS A     |
| 881 | 6ar1 | A | 10.3 | 4.1 | 286 | 417  | 10 | GSI-IIC RT                                         |
| 882 | 6f5p | B | 10.3 | 4.5 | 305 | 710  | 13 | POLYMERASE ACIDIC PROTEIN                          |
| 883 | 6abg | B | 10.2 | 4.3 | 313 | 695  | 15 | POLYMERASE 3                                       |
| 884 | 2r70 | A | 10.2 | 3.4 | 351 | 752  | 11 | INFECTIOUS BURSAL VIRUS VP1<br>POLYMERASE          |
| 885 | 5amq | A | 10.1 | 6.8 | 366 | 1666 | 8  | RNA POLYMERASE L                                   |
| 886 | 5d9a | B | 10.1 | 4.4 | 299 | 711  | 13 | POLYMERASE ACIDIC PROTEIN                          |
| 887 | 5gap | A | 10   | 3.9 | 334 | 1349 | 7  | U4 SNRNA, 5' REGION, NUCLEOTIDES 1-67              |
| 888 | 2r7q | A | 10   | 3.9 | 316 | 1072 | 9  | RNA-DEPENDENT RNA POLYMERASE                       |
| 889 | 6ab7 | B | 10   | 4.2 | 300 | 702  | 14 | POLYMERASE 3                                       |
| 890 | 6evk | B | 10   | 4.1 | 305 | 748  | 10 | POLYMERASE ACIDIC PROTEIN                          |
| 891 | 2yia | D | 9.9  | 3.4 | 352 | 790  | 11 | RNA-DIRECTED RNA POLYMERASE                        |

|     |      |   |     |      |     |      |    |                                                 |
|-----|------|---|-----|------|-----|------|----|-------------------------------------------------|
| 892 | 6abf | B | 9.9 | 4.2  | 307 | 702  | 13 |                                                 |
| 893 | 6abb | B | 9.9 | 4.5  | 301 | 702  | 13 |                                                 |
| 894 | 2pgg | A | 9.9 | 3.4  | 351 | 765  | 11 | RNA-DIRECTED RNA POLYMERASE                     |
| 895 | 6evj | E | 9.9 | 4.2  | 307 | 749  | 10 | POLYMERASE ACIDIC PROTEIN                       |
| 896 | 6kuv | B | 9.9 | 4.2  | 307 | 705  | 14 | POLYMERASE 3                                    |
| 897 | 2yib | A | 9.8 | 3.4  | 350 | 789  | 11 | RNA-DIRECTED RNA POLYMERASE                     |
| 898 | 3avy | A | 9.8 | 5.7  | 267 | 1203 | 10 |                                                 |
| 899 | 2yib | B | 9.8 | 3.4  | 350 | 789  | 11 | RNA-DIRECTED RNA POLYMERASE                     |
| 900 | 1hi1 | B | 9.8 | 4.2  | 342 | 664  | 12 | P2 PROTEIN                                      |
| 901 | 2yia | E | 9.7 | 3.4  | 350 | 790  | 10 | RNA-DIRECTED RNA POLYMERASE                     |
| 902 | 4f5x | W | 9.7 | 3.7  | 290 | 975  | 9  | VP2 PROTEIN                                     |
| 903 | 2yia | B | 9.7 | 3.4  | 350 | 790  | 10 | RNA-DIRECTED RNA POLYMERASE                     |
| 904 | 3avv | A | 9.7 | 5.9  | 270 | 1203 | 10 |                                                 |
| 905 | 3mmp | G | 9.7 | 4.4  | 263 | 549  | 11 | ELONGATION FACTOR TU 2,<br>ELONGATION FACTOR TS |
| 906 | 4a8w | C | 9.7 | 4.1  | 343 | 643  | 12 | RNA-DIRECTED RNA POLYMERASE                     |
| 907 | 6abd | B | 9.7 | 4.5  | 298 | 702  | 13 | POLYMERASE 3                                    |
| 908 | 4ieg | B | 9.7 | 4    | 323 | 634  | 10 | RNA-DEPENDENT RNA POLYMERASE P2                 |
| 909 | 6kuu | B | 9.7 | 4.3  | 309 | 705  | 13 | POLYMERASE 3                                    |
| 910 | 3zed | A | 9.6 | 3.3  | 351 | 765  | 10 | RNA-DIRECTED RNA POLYMERASE                     |
| 911 | 2yi9 | B | 9.6 | 3.4  | 351 | 771  | 10 | RNA-DIRECTED RNA POLYMERASE                     |
| 912 | 2jlg | C | 9.6 | 4.1  | 344 | 651  | 11 | RNA-DIRECTED RNA POLYMERASE                     |
| 913 | 2jlf | A | 9.6 | 4.1  | 343 | 654  | 12 | RNA-DIRECTED RNA POLYMERASE                     |
| 914 | 2yi9 | D | 9.5 | 3.3  | 351 | 771  | 11 | RNA-DIRECTED RNA POLYMERASE                     |
| 915 | 2yia | G | 9.5 | 3.4  | 351 | 762  | 11 | RNA-DIRECTED RNA POLYMERASE                     |
| 916 | 2yi8 | B | 9.5 | 3.4  | 351 | 771  | 11 | RNA-DIRECTED RNA POLYMERASE                     |
| 917 | 3zed | B | 9.5 | 3.4  | 352 | 766  | 11 | RNA-DIRECTED RNA POLYMERASE                     |
| 918 | 6qpg | K | 9.5 | 4.3  | 304 | 664  | 10 | POLYMERASE ACIDIC PROTEIN                       |
| 919 | 2jlg | B | 9.5 | 4.2  | 346 | 664  | 12 | RNA-DIRECTED RNA POLYMERASE                     |
| 920 | 2jlf | C | 9.5 | 4.1  | 344 | 654  | 12 | RNA-DIRECTED RNA POLYMERASE                     |
| 921 | 1uvk | E | 9.4 | 4.2  | 346 | 664  | 12 | RNA-DIRECTED RNA POLYMERASE                     |
| 922 | 5gan | A | 9.4 | 15.8 | 351 | 2196 | 8  |                                                 |
| 923 | 4b02 | C | 9.4 | 4    | 342 | 664  | 11 | RNA-DIRECTED RNA POLYMERASE                     |
| 924 | 4a8q | A | 9.4 | 4.1  | 344 | 664  | 12 | RNA-DIRECTED RNA POLYMERASE                     |
| 925 | 1uvk | A | 9.4 | 4.2  | 345 | 664  | 12 | RNA-DIRECTED RNA POLYMERASE                     |
| 926 | 1uvk | C | 9.4 | 4.2  | 344 | 664  | 12 | RNA-DIRECTED RNA POLYMERASE                     |
| 927 | 4a8o | C | 9.4 | 4.2  | 347 | 664  | 12 | RNA-DIRECTED RNA POLYMERASE                     |
| 928 | 4a8s | A | 9.4 | 4.2  | 345 | 664  | 12 | RNA-DIRECTED RNA POLYMERASE                     |
| 929 | 1uvm | B | 9.4 | 4    | 339 | 664  | 12 | RNA-DEPENDENT RNA POLYMERASE                    |
| 930 | 4a8w | B | 9.4 | 4.2  | 346 | 664  | 12 | RNA-DIRECTED RNA POLYMERASE                     |
| 931 | 4a8o | B | 9.4 | 4.2  | 344 | 664  | 12 | RNA-DIRECTED RNA POLYMERASE                     |
| 932 | 1uvi | A | 9.4 | 4.2  | 346 | 664  | 12 | RNA-DEPENDENT RNA POLYMERASE                    |



|     |      |   |     |     |     |      |    |                                                  |
|-----|------|---|-----|-----|-----|------|----|--------------------------------------------------|
| 933 | 4a8q | B | 9.4 | 4.2 | 343 | 664  | 12 | RNA-DIRECTED RNA POLYMERASE                      |
| 934 | 4b02 | B | 9.4 | 4.1 | 340 | 664  | 11 | RNA-DIRECTED RNA POLYMERASE                      |
| 935 | 4a8k | B | 9.4 | 4.2 | 347 | 664  | 12 | RNA-DIRECTED RNA POLYMERASE                      |
| 936 | 4a8f | A | 9.4 | 4.1 | 344 | 664  | 12 | RNA-DIRECTED RNA POLYMERASE                      |
| 937 | 4a8y | A | 9.4 | 4.2 | 345 | 664  | 12 | RNA-DIRECTED RNA POLYMERASE                      |
| 938 | 4a8m | P | 9.4 | 4.2 | 349 | 664  | 12 | RNA-DIRECTED RNA POLYMERASE                      |
| 939 | 1hi0 | P | 9.4 | 4.2 | 345 | 664  | 12 | P2 PROTEIN                                       |
| 940 | 1hi8 | A | 9.4 | 4.2 | 346 | 664  | 12 | P2 PROTEIN                                       |
| 941 | 2jlg | A | 9.4 | 4.2 | 346 | 664  | 11 | RNA-DIRECTED RNA POLYMERASE                      |
| 942 | 6ty8 | A | 9.4 | 4.8 | 317 | 1196 | 10 | RNA-DEPENDENT RNA POLYMERASE                     |
| 943 | 1uvi | B | 9.4 | 4.2 | 345 | 664  | 12 | RNA-DEPENDENT RNA POLYMERASE                     |
| 944 | 2pus | A | 9.4 | 3.5 | 352 | 765  | 11 | IBDV VP1 RNA-DEPENDANT RNA POLYMERASE            |
| 945 | 1hi0 | Q | 9.4 | 4.2 | 345 | 664  | 12 | P2 PROTEIN                                       |
| 946 | 1hi0 | R | 9.4 | 4.2 | 345 | 664  | 12 | P2 PROTEIN                                       |
| 947 | 1hi1 | A | 9.4 | 4.2 | 347 | 664  | 12 | P2 PROTEIN                                       |
| 948 | 2yia | F | 9.3 | 3.4 | 351 | 782  | 11 | RNA-DIRECTED RNA POLYMERASE                      |
| 949 | 2yia | H | 9.3 | 3.4 | 352 | 790  | 11 | RNA-DIRECTED RNA POLYMERASE                      |
| 950 | 4a8f | B | 9.3 | 4   | 346 | 664  | 11 | RNA-DIRECTED RNA POLYMERASE                      |
| 951 | 1hi1 | C | 9.3 | 4.1 | 346 | 664  | 12 | P2 PROTEIN                                       |
| 952 | 2jl9 | B | 9.3 | 4.1 | 346 | 656  | 12 | RNA-DIRECTED RNA POLYMERASE                      |
| 953 | 2yia | A | 9.2 | 3.4 | 349 | 790  | 11 | RNA-DIRECTED RNA POLYMERASE                      |
| 954 | 2yib | C | 9.2 | 3.4 | 351 | 789  | 10 | RNA-DIRECTED RNA POLYMERASE                      |
| 955 | 2yia | C | 9.2 | 3.4 | 352 | 790  | 11 | RNA-DIRECTED RNA POLYMERASE                      |
| 956 | 3avu | A | 9.2 | 5.6 | 272 | 1203 | 10 |                                                  |
| 957 | 6qwl | K | 9.1 | 4.3 | 271 | 539  | 10 | POLYMERASE ACIDIC PROTEIN                        |
| 958 | 3jb6 | A | 9.1 | 4.7 | 317 | 1196 | 9  | RNA-DEPENDENT RNA POLYMERASE                     |
| 959 | 6kup | B | 9   | 4.2 | 294 | 701  | 13 | POLYMERASE 3                                     |
| 960 | 5mps | A | 8.9 | 4   | 339 | 1914 | 7  | YEAST UBC4 GENE FOR UBIQUITIN-CONJUGATING ENZYME |
| 961 | 3zef | E | 8.8 | 3.7 | 313 | 1420 | 6  | PRE-MRNA-SPLICING FACTOR 8                       |
| 962 | 3zef | B | 8.8 | 3.8 | 316 | 1398 | 6  | PRE-MRNA-SPLICING FACTOR 8                       |
| 963 | 4i43 | B | 8.7 | 3.6 | 318 | 1407 | 7  | A1 CISTRON-SPLICING FACTOR AAR2                  |
| 964 | 5mqf | A | 8.7 | 4.1 | 334 | 1965 | 8  | PRE-MRNA-PROCESSING-SPLICING FACTOR 8            |
| 965 | 6qnw | K | 8.7 | 4.3 | 302 | 673  | 11 | POLYMERASE ACIDIC PROTEIN                        |
| 966 | 3mmp | F | 8.6 | 4.3 | 270 | 549  | 11 | ELONGATION FACTOR TU 2,<br>ELONGATION FACTOR TS  |
| 967 | 6me0 | C | 8.6 | 4.5 | 273 | 414  | 10 | T.EL4H RNA                                       |
| 968 | 5mq0 | A | 8.6 | 3.9 | 336 | 1914 | 6  | YEAST UBC4 GENE FOR UBIQUITIN-CONJUGATING ENZYME |
| 969 | 6j6q | A | 8.5 | 3.9 | 339 | 1913 | 7  | PRE-MRNA-SPLICING FACTOR 8                       |

|      |          |   |     |     |     |      |    |                                               |
|------|----------|---|-----|-----|-----|------|----|-----------------------------------------------|
| 970  | 5y88     | A | 8.5 | 4.1 | 336 | 1903 | 7  | PRE-MRNA-SPLICING FACTOR 8                    |
| 971  | 2r7x     | A | 8.4 | 4   | 326 | 1073 | 10 | RNA (5'-R(*UP*GP*UP*GP*AP*CP*C)-3')           |
| 972  | 5wsg     | A | 8.4 | 3.9 | 335 | 1931 | 8  | PRE-MRNA-SPLICING FACTOR 8                    |
| 973  | 2r7s     | A | 8.3 | 3.8 | 315 | 1073 | 10 | RNA (5'-R(*UP*GP*UP*GP*CP*C)-3')              |
| 974  | 1mwh     | A | 8.3 | 4.3 | 332 | 1256 | 9  | MINOR CORE PROTEIN LAMBDA 3                   |
| 975  | 3jcm     | A | 8.2 | 4   | 332 | 2174 | 7  | PRE-MRNA-SPLICING FACTOR 8                    |
| 976  | 6exn     | A | 8.2 | 3.9 | 338 | 1945 | 7  | U2 SNRNA                                      |
| 977  | 6j6h     | A | 8.2 | 3.9 | 339 | 1913 | 7  | PRE-MRNA-SPLICING FACTOR 8                    |
| 978  | 5ylz     | A | 8.1 | 4   | 341 | 1931 | 6  | PRE-MRNA-SPLICING FACTOR 8                    |
| 979  | 3jb9     | A | 8   | 4   | 338 | 1964 | 6  | PRE-MRNA-SPLICING FACTOR SPP42                |
| 980  | 6id0     | A | 8   | 3.9 | 341 | 1981 | 7  | PRE-MRNA-PROCESSING-SPLICING FACTOR 8         |
| 981  | 6ff4     | A | 8   | 3.8 | 331 | 2238 | 7  | RNA-BINDING MOTIF PROTEIN, X-LINKED 2         |
| 982  | 6qx8     | F | 7.9 | 4.5 | 321 | 611  | 9  | POLYMERASE ACIDIC PROTEIN                     |
| 983  | 6qxe     | F | 7.9 | 4.5 | 321 | 611  | 9  | NB8205                                        |
| 984  | 5amr     | A | 7.8 | 7.1 | 371 | 1657 | 8  | RNA POLYMERASE L                              |
| 985  | 6qx8     | B | 7.8 | 4.4 | 317 | 611  | 10 | POLYMERASE ACIDIC PROTEIN                     |
| 986  | 6id1     | A | 7.8 | 3.9 | 341 | 1981 | 7  | PRE-MRNA-PROCESSING-SPLICING FACTOR 8         |
| 987  | 6pns     | A | 7.7 | 4.2 | 332 | 1291 | 10 | RNA-DIRECTED RNA POLYMERASE                   |
| 988  | 6icz     | A | 7.7 | 4   | 338 | 2253 | 7  | PROTEIN MAGO NASHI HOMOLOG 2                  |
| 989  | 6qx3     | B | 7.7 | 4.4 | 299 | 615  | 10 | RNA (5'-R(P*AP*GP*CP*AP*AP*AP*AP*GP*CP*A)-3') |
| 990  | 6qxe     | B | 7.6 | 4.5 | 314 | 611  | 10 | NB8205                                        |
| 991  | 6mec     | C | 7.5 | 4.5 | 268 | 414  | 9  | T.EL4H RNA                                    |
| 992  | 5d98     | E | 7.5 | 4.4 | 298 | 711  | 13 | POLYMERASE ACIDIC PROTEIN                     |
| 993  | 1muk     | A | 7.4 | 4.4 | 342 | 1256 | 8  | MINOR CORE PROTEIN LAMBDA 3                   |
| 994  | 6qpf     | K | 7.4 | 4.4 | 302 | 662  | 10 | POLYMERASE ACIDIC PROTEIN                     |
| 995  | 5gmk     | A | 7.4 | 4.1 | 342 | 1910 | 8  | PRE-MRNA-SPLICING FACTOR 8                    |
| 996  | 6pzk     | A | 7.3 | 3.6 | 296 | 1361 | 10 | RNA-DIRECTED RNA POLYMERASE L                 |
| 997  | 3j9b     | I | 7.3 | 4.4 | 264 | 440  | 0  | POLYMERASE                                    |
| 998  | 2r7v     | A | 7.3 | 3.9 | 318 | 1073 | 9  | RNA (5'-R(*G*GP*CP*UP*UP*U)-3')               |
| 999  | 6.00E+53 | A | 7.3 | 7.1 | 240 | 596  | 10 | TELOMERASE REVERSE TRANSCRIPTASE              |
| 1000 | 3j9b     | B | 7.3 | 4.5 | 271 | 440  | 0  | POLYMERASE                                    |
| 1001 | 5d9a     | E | 7.3 | 4.4 | 296 | 711  | 12 | POLYMERASE ACIDIC PROTEIN                     |
| 1002 | 6rr7     | B | 7.2 | 4.1 | 299 | 744  | 11 | POLYMERASE ACIDIC PROTEIN                     |
| 1003 | 5zwo     | A | 7.2 | 4   | 337 | 2172 | 6  | PRE-MRNA-SPLICING FACTOR 8                    |
| 1004 | 3kyl     | A | 7.2 | 7   | 244 | 596  | 9  | TELOMERASE REVERSE TRANSCRIPTASE              |
| 1005 | 6u5o     | L | 7   | 3.9 | 298 | 1354 | 11 | RNA-DIRECTED RNA POLYMERASE L                 |
| 1006 | 6fhh     | B | 6.9 | 4.1 | 305 | 750  | 11 | POLYMERASE ACIDIC PROTEIN                     |

|      |      |   |     |      |     |      |    |                                          |
|------|------|---|-----|------|-----|------|----|------------------------------------------|
| 1007 | 5o9z | A | 6.9 | 4.1  | 340 | 2185 | 7  | PRE-MRNA-PROCESSING-SPLICING<br>FACTOR 8 |
| 1008 | 6j6n | A | 6.9 | 3.9  | 336 | 1913 | 7  | PRE-MRNA-SPLICING FACTOR 8               |
| 1009 | 3avx | A | 6.8 | 4.6  | 268 | 1203 | 10 |                                          |
| 1010 | 6fhi | B | 6.8 | 4.1  | 302 | 750  | 11 | POLYMERASE ACIDIC PROTEIN                |
| 1011 | 2r7r | A | 6.6 | 3.8  | 320 | 1073 | 10 | RNA (5'-R(*UP*GP*UP*GP*AP*CP*C)-3')      |
| 1012 | 6tz2 | A | 6.6 | 7.3  | 342 | 1208 | 8  | RNA-DEPENDENT RNA POLYMERASE             |
| 1013 | 3du5 | A | 6.6 | 6.9  | 233 | 596  | 9  | TELOMERASE REVERSE TRANSCRIPTASE         |
| 1014 | 3jb7 | A | 6.5 | 6.7  | 345 | 1198 | 8  | CPV RNA-DEPENDENT RNA POLYMERASE         |
| 1015 | 5d9a | H | 6.4 | 4.4  | 299 | 711  | 13 | POLYMERASE ACIDIC PROTEIN                |
| 1016 | 6bk8 | A | 6.4 | 4    | 333 | 1960 | 6  | U2 SNRNA                                 |
| 1017 | 5m3h | B | 6.3 | 4.1  | 318 | 750  | 10 | POLYMERASE ACIDIC PROTEIN                |
| 1018 | 4au6 | C | 6.2 | 3.8  | 314 | 1071 | 9  | RNA-DEPENDENT RNA POLYMERASE             |
| 1019 | 4au6 | B | 6.2 | 3.8  | 314 | 1071 | 9  | RNA-DEPENDENT RNA POLYMERASE             |
| 1020 | 5lj5 | A | 5.8 | 4    | 335 | 2168 | 6  | U5 SNRNA (SMALL NUCLEAR RNA)             |
| 1021 | 2r7o | A | 5.7 | 3.8  | 315 | 1071 | 9  | RNA-DEPENDENT RNA POLYMERASE             |
| 1022 | 6tz1 | A | 5.6 | 4.3  | 340 | 1208 | 9  | RNA-DEPENDENT RNA POLYMERASE             |
| 1023 | 5cqq | B | 5.6 | 7.5  | 227 | 596  | 9  | TELOMERASE REVERSE TRANSCRIPTASE         |
| 1024 | 1n35 | A | 5.5 | 4.3  | 332 | 1264 | 9  | 5'-R(P*GP*GP*GP*GP*G)-3'                 |
| 1025 | 4au6 | D | 5.1 | 3.8  | 313 | 1071 | 10 | RNA-DEPENDENT RNA POLYMERASE             |
| 1026 | 5g2x | C | 5.1 | 5.2  | 230 | 486  | 8  | GROUP II INTRON                          |
| 1027 | 1qai | B | 5   | 4.2  | 167 | 251  | 5  | DNA (5'-D(*CP*AP*TP*GP*CP*AP*TP*G)-3')   |
| 1028 | 1qaj | A | 4.9 | 4.4  | 167 | 259  | 6  | DNA (5'-D(*CP*AP*TP*GP*CP*AP*TP*G)-3')   |
| 1029 | 1qai | A | 4.8 | 4    | 161 | 251  | 6  | DNA (5'-D(*CP*AP*TP*GP*CP*AP*TP*G)-3')   |
| 1030 | 1d1u | A | 4.8 | 4    | 160 | 255  | 6  | DNA (5'-D(*CP*TP*CP*GP*TP*G)-3')         |
| 1031 | 4au6 | E | 4.8 | 3.8  | 314 | 1071 | 9  | RNA-DEPENDENT RNA POLYMERASE             |
| 1032 | 6v86 | A | 4.7 | 3.9  | 301 | 1890 | 8  | RNA-DIRECTED RNA POLYMERASE L            |
| 1033 | 4ol8 | B | 4.7 | 5.1  | 178 | 452  | 9  | REVERSE<br>TRANSCRIPTASE/RIBONUCLEASE H  |
| 1034 | 4au6 | A | 4.7 | 3.8  | 315 | 1071 | 9  | RNA-DEPENDENT RNA POLYMERASE             |
| 1035 | 6po2 | A | 4.6 | 4.2  | 312 | 1244 | 10 | RNA-DIRECTED RNA POLYMERASE              |
| 1036 | 1n1h | A | 4.4 | 4.4  | 342 | 1264 | 8  | 5'-R(*AP*UP*UP*AP*GP*C)-3'               |
| 1037 | 3du6 | A | 3.7 | 10.4 | 251 | 596  | 10 | TELOMERASE REVERSE TRANSCRIPTASE         |
| 1038 | 5cqq | A | 3.7 | 7.2  | 239 | 596  | 10 | TELOMERASE REVERSE TRANSCRIPTASE         |
| 1039 | 3du6 | B | 3.7 | 9.4  | 242 | 596  | 7  | TELOMERASE REVERSE TRANSCRIPTASE         |
| 1040 | 3du5 | B | 3.3 | 7    | 226 | 596  | 9  | TELOMERASE REVERSE TRANSCRIPTASE         |
| 1041 | 1dg3 | A | 2.7 | 8.3  | 82  | 540  | 16 |                                          |
| 1042 | 2b7c | A | 2.5 | 6.2  | 76  | 437  | 3  | ELONGATION FACTOR 1-ALPHA                |
| 1043 | 4q7j | A | 2.4 | 12.8 | 81  | 278  | 12 | ELONGATION FACTOR TS                     |
| 1044 | 5gm2 | B | 2.4 | 15.2 | 62  | 283  | 6  | O-METHYLTRANSFERASE                      |
| 1045 | 3zvr | A | 2.4 | 3.2  | 50  | 669  | 8  | DYNAMIN-1                                |

|      |      |   |     |      |    |     |    |                                               |
|------|------|---|-----|------|----|-----|----|-----------------------------------------------|
| 1046 | 5wp4 | A | 2.4 | 12.9 | 82 | 487 | 5  | PHOSPHOETHANOLAMINE N-METHYLTRANSFERASE 1     |
| 1047 | 1aip | D | 2.4 | 5.9  | 68 | 195 | 12 | ELONGATION FACTOR TU                          |
| 1048 | 5gam | A | 2.4 | 5.7  | 70 | 593 | 6  | U5 SNRNA                                      |
| 1049 | 1yra | B | 2.3 | 10.4 | 66 | 261 | 6  | ATP(GTP)BINDING PROTEIN                       |
| 1050 | 4q7j | E | 2.3 | 15.6 | 81 | 280 | 15 | ELONGATION FACTOR TS                          |
| 1051 | 4pc6 | C | 2.3 | 14.5 | 70 | 277 | 9  | ELONGATION FACTOR TU                          |
| 1052 | 2dby | A | 2.3 | 9.6  | 58 | 355 | 5  | GTP-BINDING PROTEIN                           |
| 1053 | 1aip | C | 2.2 | 6.3  | 69 | 195 | 12 | ELONGATION FACTOR TU                          |
| 1054 | 2f8l | A | 2.2 | 10.8 | 72 | 324 | 8  | HYPOTHETICAL PROTEIN LMO1582                  |
| 1055 | 2p35 | A | 2.2 | 6.2  | 97 | 246 | 8  | TRANS-ACONITATE 2-METHYLTRANSFERASE           |
| 1056 | 1aip | G | 2.2 | 6.4  | 68 | 195 | 12 | ELONGATION FACTOR TU                          |
| 1057 | 6q56 | A | 2.1 | 4.6  | 58 | 234 | 9  | TRNA (ADENINE(22)-N(1))-METHYLTRANSFERASE     |
| 1058 | 6pt0 | A | 2.1 | 6.7  | 85 | 353 | 2  | CANNABINOID RECEPTOR 2                        |
| 1059 | 3kkz | A | 2.1 | 2.6  | 44 | 257 | 5  | UNCHARACTERIZED PROTEIN Q5LES9                |
| 1060 | 5z9o | A | 2.1 | 4.5  | 51 | 373 | 2  | CYCLOPROPANE-FATTY-ACYL-PHOSPHOLIPID SYNTHASE |
| 1061 | 1aip | H | 2.1 | 6.1  | 66 | 194 | 12 | ELONGATION FACTOR TU                          |
| 1062 | 3mmp | C | 2.1 | 13.8 | 79 | 643 | 10 | ELONGATION FACTOR TU 2, ELONGATION FACTOR TS  |
| 1063 | 2ztt | C | 2.1 | 9.2  | 50 | 71  | 4  | RNA-DIRECTED RNA POLYMERASE CATALYTIC SUBUNIT |
| 1064 | 3a1g | C | 2.1 | 4.5  | 47 | 73  | 4  | RNA-DIRECTED RNA POLYMERASE CATALYTIC SUBUNIT |
| 1065 | 3a1g | A | 2.1 | 5.5  | 47 | 73  | 2  | RNA-DIRECTED RNA POLYMERASE CATALYTIC SUBUNIT |
| 1066 | 2ztt | A | 2.1 | 4.5  | 46 | 73  | 4  | RNA-DIRECTED RNA POLYMERASE CATALYTIC SUBUNIT |
| 1067 | 2qm8 | A | 2   | 3.1  | 47 | 320 | 4  | GTPASE/ATPASE                                 |
| 1068 | 1efu | D | 2   | 13.4 | 74 | 282 | 14 | ELONGATION FACTOR TU                          |

**Table S2.** NSP-12 cavities and their information predicted by CavityPlus server.

| Rank | Pred. Max pKd | Pred. Avg pKd | Drug Score | Druggability | Residues                                                                                                                                                                                                                                                                                                                                                                                                                                                                                                                                                                                                                                                                                                                                                                                                                                                                                                                                                                                                                                                                                                                                                                                                                                                                                                                                                                                                                                                                                                                                                                                                                                                                                                                                                     |
|------|---------------|---------------|------------|--------------|--------------------------------------------------------------------------------------------------------------------------------------------------------------------------------------------------------------------------------------------------------------------------------------------------------------------------------------------------------------------------------------------------------------------------------------------------------------------------------------------------------------------------------------------------------------------------------------------------------------------------------------------------------------------------------------------------------------------------------------------------------------------------------------------------------------------------------------------------------------------------------------------------------------------------------------------------------------------------------------------------------------------------------------------------------------------------------------------------------------------------------------------------------------------------------------------------------------------------------------------------------------------------------------------------------------------------------------------------------------------------------------------------------------------------------------------------------------------------------------------------------------------------------------------------------------------------------------------------------------------------------------------------------------------------------------------------------------------------------------------------------------|
| 1    | 6.99          | 6.71          | 2315       | Druggable    | ASP:161:A, ASP:164:A, PHE:165:A, VAL:166:A, GLU:167:A, GLN:408:A, THR:409:A, VAL:410:A, LYS:411:A, LYS:438:A, HIS:439:A, PHE:441:A, ASP:452:A, TYR:455:A, TYR:456:A, ARG:457:A, TYR:458:A, VAL:493:A, ILE:494:A, VAL:495:A, ASN:496:A, ASN:497:A, LEU:498:A, ASP:499:A, LYS:500:A, SER:501:A, ALA:502:A, GLY:503:A, PHE:506:A, ASN:507:A, LYS:508:A, GLY:510:A, LYS:511:A, GLN:541:A, MET:542:A, ASN:543:A, LEU:544:A, LYS:545:A, TYR:546:A, ALA:547:A, ILE:548:A, SER:549:A, ALA:550:A, LYS:551:A, ASN:552:A, ARG:553:A, ALA:554:A, ARG:555:A, THR:556:A, VAL:557:A, ALA:558:A, GLY:559:A, VAL:560:A, THR:565:A, ASN:568:A, ARG:569:A, HIS:572:A, GLN:573:A, LEU:575:A, LEU:576:A, LYS:577:A, SER:578:A, ILE:579:A, ALA:580:A, ALA:581:A, ARG:583:A, VAL:588:A, ILE:589:A, GLY:590:A, THR:591:A, SER:592:A, LYS:593:A, PHE:594:A, TRP:598:A, MET:601:A, MET:615:A, GLY:616:A, TRP:617:A, ASP:618:A, TYR:619:A, PRO:620:A, LYS:621:A, CYS:622:A, ASP:623:A, ARG:624:A, LYS:676:A, THR:680:A, SER:681:A, SER:682:A, GLY:683:A, ASP:684:A, ALA:685:A, THR:686:A, THR:687:A, ALA:688:A, TYR:689:A, ASN:691:A, SER:692:A, MET:756:A, LEU:758:A, SER:759:A, ASP:760:A, ASP:761:A, ALA:762:A, VAL:763:A, VAL:792:A, PHE:793:A, MET:794:A, SER:795:A, GLU:796:A, ALA:797:A, LYS:798:A, CYS:799:A, TRP:800:A, THR:801:A, HIS:810:A, GLU:811:A, PHE:812:A, CYS:813:A, SER:814:A, GLN:815:A, HIS:816:A, PRO:830:A, TYR:831:A, PRO:832:A, ASP:833:A, SER:835:A, ARG:836:A, ILE:837:A, GLY:839:A, ALA:840:A, GLY:841:A, PHE:843:A, VAL:844:A, ASP:845:A, ASP:846:A, ILE:847:A, VAL:848:A, THR:853:A, LEU:854:A, MET:855:A, ILE:856:A, GLU:857:A, ARG:858:A, PHE:859:A, VAL:860:A, SER:861:A, LEU:862:A, ALA:863:A, ILE:864:A, ASP:865:A, ALA:866:A, TYR:915:A, TRP:916:A |
| 2    | 8.57          | 6.81          | 1466       | Druggable    | VAL:31:A, TYR:32:A, ARG:33:A, ALA:34:A, PHE:35:A, ASP:36:A, ILE:37:A, TYR:38:A, ASN:39:A, ASP:40:A, LYS:41:A, VAL:42:A, ALA:43:A, GLY:44:A, LYS:47:A, PHE:48:A, LEU:49:A, LYS:50:A, TYR:69:A, PHE:70:A, VAL:71:A, VAL:72:A, LYS:73:A, ARG:74:A, THR:76:A, ASN:79:A, TYR:80:A, GLN:81:A, HIS:82:A, GLU:83:A, GLU:84:A, ILE:86:A, TYR:87:A, HIS:99:A, PRO:112:A,                                                                                                                                                                                                                                                                                                                                                                                                                                                                                                                                                                                                                                                                                                                                                                                                                                                                                                                                                                                                                                                                                                                                                                                                                                                                                                                                                                                               |

|   |       |      |      |                |                                                                                                                                                                                                                                                                                                                                                                                                                                                                                                                                                                                                                                                                                                                                                                                                                                                                                                                                      |
|---|-------|------|------|----------------|--------------------------------------------------------------------------------------------------------------------------------------------------------------------------------------------------------------------------------------------------------------------------------------------------------------------------------------------------------------------------------------------------------------------------------------------------------------------------------------------------------------------------------------------------------------------------------------------------------------------------------------------------------------------------------------------------------------------------------------------------------------------------------------------------------------------------------------------------------------------------------------------------------------------------------------|
|   |       |      |      |                | HIS:113:A, ILE:114:A, SER:115:A, ARG:116:A, LEU:119:A, THR:120:A, LYS:121:A, TYR:122:A, THR:123:A, ALA:125:A, ASP:126:A, VAL:202:A, GLY:203:A, VAL:204:A, LEU:205:A, THR:206:A, LEU:207:A, ASP:208:A, ASN:209:A, ASP:211:A, LEU:212:A, TRP:216:A, TYR:217:A, ASP:218:A, PHE:219:A, GLY:220:A, ASP:221:A, PHE:222:A, ILE:223:A, VAL:233:A, SER:236:A, ASP:711:A, ASN:713:A, HIS:725:A, TYR:728:A, ARG:733:A                                                                                                                                                                                                                                                                                                                                                                                                                                                                                                                           |
| 3 | 8.83  | 6.83 | 160  | Less druggable | ARG:33:A, ALA:34:A, PHE:35:A, ASP:36:A, ILE:37:A, TYR:38:A, ASN:39:A, VAL:42:A, PHE:48:A, LYS:50:A, VAL:71:A, VAL:72:A, LYS:73:A, ARG:74:A, THR:76:A, PHE:77:A, SER:78:A, ASN:79:A, TYR:80:A, GLN:81:A, HIS:82:A, GLU:83:A, GLU:84:A, THR:85:A, ILE:86:A, TYR:87:A, ASN:88:A, LYS:91:A, LYS:98:A, HIS:99:A, ASP:100:A, PHE:101:A, PHE:102:A, PRO:112:A, HIS:113:A, ILE:114:A, SER:115:A, ARG:116:A, LEU:119:A, THR:120:A, LYS:121:A, THR:123:A, GLY:203:A, VAL:204:A, LEU:205:A, THR:206:A, LEU:207:A, ASP:208:A, ASN:209:A, TRP:216:A, TYR:217:A, ASP:218:A, PHE:219:A, GLY:220:A, ASP:221:A, PHE:222:A, ILE:223:A                                                                                                                                                                                                                                                                                                                  |
| 4 | 9.65  | 6.88 | 2190 | Druggable      | PHE:165:A, VAL:166:A, GLU:167:A, ASN:168:A, PRO:169:A, ASP:170:A, ILE:171:A, LEU:172:A, ARG:173:A, VAL:174:A, ALA:176:A, ASN:177:A, PRO:243:A, LEU:245:A, THR:246:A, LEU:247:A, THR:248:A, ARG:249:A, ALA:250:A, LEU:251:A, THR:252:A, ALA:253:A, GLU:254:A, SER:255:A, HIS:256:A, LEU:261:A, PRO:264:A, TYR:265:A, ILE:266:A, LYS:267:A, TRP:268:A, ASP:269:A, LEU:270:A, ASN:314:A, VAL:315:A, LEU:316:A, PHE:317:A, SER:318:A, THR:319:A, VAL:320:A, PHE:321:A, PRO:322:A, PRO:323:A, THR:324:A, SER:325:A, PHE:326:A, ARG:349:A, GLU:350:A, LEU:387:A, LEU:388:A, LEU:389:A, ASP:390:A, LYS:391:A, ARG:392:A, THR:393:A, THR:394:A, CYS:395:A, PHE:396:A, SER:397:A, VAL:398:A, ALA:399:A, TYR:453:A, ASP:454:A, TYR:455:A, TYR:456:A, ARG:457:A, TYR:458:A, ASN:459:A, LEU:460:A, PRO:461:A, THR:462:A, MET:463:A, PRO:627:A, ASN:628:A, MET:629:A, SER:664:A, TYR:674:A, VAL:675:A, LYS:676:A, PRO:677:A, GLY:678:A, ASN:791:A |
| 5 | 10.74 | 6.95 | 3183 | Druggable      | TRP:268:A, ASP:269:A, LEU:270:A, LEU:271:A, LYS:272:A, TYR:273:A, ASP:274:A, PHE:275:A, PRO:322:A, PRO:323:A, THR:324:A, SER:325:A, PHE:326:A, GLY:327:A, PRO:328:A, LEU:329:A, VAL:330:A, ARG:331:A, LYS:332:A, PHE:340:A, VAL:341:A, VAL:342:A, SER:343:A, THR:344:A, GLY:345:A, TYR:346:A, HIS:347:A, PHE:348:A, ARG:349:A, GLU:350:A, LEU:351:A, HIS:355:A, ASP:377:A, PRO:378:A, ALA:379:A, MET:380:A, HIS:381:A,                                                                                                                                                                                                                                                                                                                                                                                                                                                                                                               |

|    |       |      |      |             |                                                                                                                                                                                                                                                                                                                                                                                                                                                                                                                                                                                                                                                                                                                                                                                                                                                                                          |
|----|-------|------|------|-------------|------------------------------------------------------------------------------------------------------------------------------------------------------------------------------------------------------------------------------------------------------------------------------------------------------------------------------------------------------------------------------------------------------------------------------------------------------------------------------------------------------------------------------------------------------------------------------------------------------------------------------------------------------------------------------------------------------------------------------------------------------------------------------------------------------------------------------------------------------------------------------------------|
|    |       |      |      |             | ALA:382:A, ALA:383:A, SER:384:A, GLY:385:A, ASN:386:A, LEU:387:A, LEU:388:A, LEU:389:A, ASP:390:A, LYS:391:A, THR:394:A, CYS:395:A, PHE:396:A, SER:397:A, VAL:398:A, ALA:399:A, ALA:400:A, PRO:537:A, ASN:628:A, CYS:659:A, ALA:660:A, LEU:663:A, SER:664:A, GLU:665:A, MET:666:A, TYR:674:A, VAL:675:A, LYS:676:A, PRO:677:A, GLY:678:A                                                                                                                                                                                                                                                                                                                                                                                                                                                                                                                                                 |
| 6  | 10.84 | 6.96 | 1525 | Druggable   | PHE:165:A, VAL:166:A, ASN:168:A, PRO:169:A, ASP:170:A, ILE:171:A, LEU:172:A, ARG:173:A, VAL:174:A, TYR:175:A, ALA:176:A, ASN:177:A, LEU:178:A, GLY:179:A, GLU:180:A, ARG:181:A, ARG:183:A, PRO:243:A, LEU:245:A, THR:246:A, LEU:247:A, THR:248:A, ARG:249:A, ALA:250:A, LEU:251:A, THR:252:A, ALA:253:A, GLU:254:A, SER:255:A, HIS:256:A, LEU:261:A, LYS:263:A, PRO:264:A, TYR:265:A, ILE:266:A, LYS:267:A, TRP:268:A, LEU:270:A, ASN:314:A, VAL:315:A, LEU:316:A, PHE:317:A, SER:318:A, THR:319:A, VAL:320:A, PHE:321:A, PRO:322:A, PRO:323:A, THR:324:A, SER:325:A, PHE:326:A, ARG:349:A, GLU:350:A, THR:393:A, THR:394:A, CYS:395:A, PHE:396:A, SER:397:A, TYR:453:A, ASP:454:A, TYR:455:A, TYR:456:A, ARG:457:A, TYR:458:A, ASN:459:A, LEU:460:A, PRO:461:A, THR:462:A, MET:463:A, PRO:627:A, ASN:628:A, MET:629:A, SER:664:A, VAL:675:A, LYS:676:A, PRO:677:A, GLY:678:A, ASN:791:A |
| 7  | 11.67 | 6.62 | -518 | Undruggable | VAL:31:A, TYR:32:A, ARG:33:A, ALA:34:A, PHE:45:A, ALA:46:A, LYS:47:A, PHE:48:A, TYR:122:A, ALA:125:A, ASP:126:A, LEU:127:A, VAL:128:A, TYR:129:A, ALA:130:A, LEU:131:A, ARG:132:A, HIS:133:A, PHE:134:A, ASP:135:A, GLU:136:A, GLY:137:A, ASN:138:A, CYS:139:A, ASP:140:A, THR:141:A, LEU:142:A, LYS:143:A, GLU:144:A, ASN:705:A, ALA:706:A, LEU:708:A, SER:709:A, THR:710:A, ASP:711:A, SER:772:A, GLN:773:A, GLY:774:A, SER:778:A, LYS:780:A, ASN:781:A, PHE:782:A, LYS:783:A, SER:784:A, GLU:796:A                                                                                                                                                                                                                                                                                                                                                                                    |
| 8  | 9.55  | 5.89 | -246 | Undruggable | LEU:366:A, PHE:368:A, GLU:370:A, LEU:371:A, LEU:372:A, VAL:373:A, TYR:374:A, ALA:375:A, ALA:376:A, ASP:377:A, MET:380:A, HIS:381:A, PRO:505:A, PHE:506:A, TRP:509:A, GLY:510:A, LEU:514:A, TYR:515:A, SER:518:A, ILE:562:A, CYS:563:A                                                                                                                                                                                                                                                                                                                                                                                                                                                                                                                                                                                                                                                    |
| 9  | 8.92  | 5.68 | -582 | Undruggable | ASN:489:A, ALA:490:A, ASN:491:A, GLN:492:A, VAL:493:A, ILE:494:A, VAL:495:A, LEU:498:A, ALA:512:A, ARG:513:A, TYR:515:A, TYR:516:A, ASP:517:A, SER:518:A, MET:519:A, SER:520:A, TYR:521:A, GLU:522:A, GLN:524:A, MET:566:A, ARG:569:A, GLN:570:A                                                                                                                                                                                                                                                                                                                                                                                                                                                                                                                                                                                                                                         |
| 10 | 8.84  | 5.65 | -637 | Undruggable | ASP:291:A, GLN:292:A, THR:293:A, HIS:295:A, CYS:301:A, LEU:302:A, ASP:303:A, ASP:304:A, ARG:305:A, CYS:306:A,                                                                                                                                                                                                                                                                                                                                                                                                                                                                                                                                                                                                                                                                                                                                                                            |

|    |      |      |       |                |                                                                                                                                                                                                                                                                                                                                                                |
|----|------|------|-------|----------------|----------------------------------------------------------------------------------------------------------------------------------------------------------------------------------------------------------------------------------------------------------------------------------------------------------------------------------------------------------------|
|    |      |      |       |                | ILE:307:A, HIS:309:A, CYS:310:A, ARG:467:A, LEU:470:A, GLU:474:A, ARG:640:A, ASN:734:A, ARG:735:A, ASP:736:A, VAL:737:A                                                                                                                                                                                                                                        |
| 11 | 8.79 | 5.63 | 38    | Less druggable | VAL:410:A, LYS:411:A, PRO:412:A, GLY:413:A, PHE:440:A, PHE:441:A, PHE:442:A, ALA:443:A, GLN:444:A, ALA:448:A, ASN:543:A, LEU:544:A, LYS:545:A, TYR:546:A, ALA:547:A, ILE:548:A, SER:549:A, ALA:550:A, LYS:551:A, ASN:552:A, ARG:553:A, ALA:554:A, ARG:555:A, THR:556:A                                                                                         |
| 12 | 8.49 | 5.53 | 35    | Less druggable | ASP:235:A, ARG:305:A, ILE:466:A, ARG:467:A, GLN:468:A, LEU:469:A, LEU:470:A, PHE:471:A, VAL:472:A, VAL:473:A, GLU:474:A, GLU:729:A, CYS:730:A, LEU:731:A, TYR:732:A, ARG:733:A, ASN:734:A, ARG:735:A, ASP:736:A, VAL:737:A, ASP:738:A, THR:739:A, PHE:741:A, VAL:742:A                                                                                         |
| 13 | 8.48 | 5.53 | -1114 | Undruggable    | LEU:302:A, ASP:303:A, ASP:304:A, ARG:305:A, CYS:306:A, GLU:474:A, ASP:477:A, LYS:478:A, PHE:480:A, ASP:481:A, CYS:482:A, TYR:483:A, ASP:484:A, GLY:485:A, GLY:486:A, LEU:636:A, VAL:637:A, LEU:638:A, ALA:639:A, ARG:640:A, LYS:641:A, HIS:642:A, THR:643:A, THR:644:A, CYS:646:A, LEU:648:A, ARG:651:A, ARG:735:A, ASP:736:A, VAL:737:A, THR:739:A, VAL:742:A |
| 14 | 8.32 | 5.47 | -598  | Undruggable    | ASN:414:A, PHE:415:A, ASN:416:A, LYS:417:A, ASP:418:A, PHE:419:A, ASP:421:A, PHE:422:A, ALA:423:A, SER:425:A, VAL:848:A, LYS:849:A, THR:850:A, ASP:851:A, GLY:852:A, THR:853:A, MET:855:A, ILE:856:A, PHE:859:A, TYR:887:A, LYS:890:A, LEU:891:A, HIS:892:A, GLU:894:A, LEU:895:A                                                                              |
| 15 | 7.84 | 5.31 | -577  | Undruggable    | VAL:335:A, PHE:340:A, VAL:341:A, VAL:342:A, LEU:366:A, PHE:368:A, GLU:370:A, LEU:371:A, LEU:372:A, VAL:373:A, TYR:374:A, ALA:375:A, ALA:376:A, ASP:377:A, ALA:379:A, MET:380:A, HIS:381:A, ALA:382:A, SER:384:A, GLY:385:A, LEU:401:A, PHE:504:A, PRO:505:A, PHE:506:A, LYS:508:A, TRP:509:A                                                                   |
| 16 | 7.76 | 5.28 | -690  | Undruggable    | ASN:611:A, HIS:613:A, LEU:614:A, MET:615:A, GLY:616:A, PHE:766:A, ASN:767:A, SER:768:A, THR:769:A, TYR:770:A, ALA:771:A, SER:772:A, GLN:773:A, GLY:774:A, VAL:776:A, ALA:777:A, SER:778:A, ILE:779:A, LYS:780:A, ASN:781:A, MET:794:A, SER:795:A, GLU:796:A, ALA:797:A, LYS:798:A, CYS:799:A, TRP:800:A, THR:801:A, GLU:802:A, THR:803:A                       |
| 17 | 7.74 | 5.27 | -1133 | Undruggable    | PHE:134:A, ASP:135:A, GLU:136:A, GLY:137:A, ASN:138:A, CYS:139:A, ASP:140:A, THR:141:A, LYS:143:A, ASP:154:A, TYR:156:A, PHE:157:A, ASN:158:A, LYS:159:A, LYS:160:A, ASP:161:A, TRP:162:A, TYR:163:A, ASP:164:A, GLU:167:A, PHE:793:A                                                                                                                          |
| 18 | 7.59 | 5.22 | -607  | Undruggable    | PRO:328:A, ARG:331:A, ILE:333:A, VAL:335:A, VAL:342:A, SER:343:A, THR:344:A, GLY:345:A,                                                                                                                                                                                                                                                                        |



|    |      |      |       |             |                                                                                                                                                                                                                                                                                                         |
|----|------|------|-------|-------------|---------------------------------------------------------------------------------------------------------------------------------------------------------------------------------------------------------------------------------------------------------------------------------------------------------|
|    |      |      |       |             | ASN:356:A, GLN:357:A, ASP:358:A, VAL:359:A, ASN:360:A, LEU:361:A, HIS:362:A, SER:363:A, SER:364:A, ARG:365:A, LEU:366:A, SER:367:A, LYS:369:A, GLU:370:A, VAL:373:A, TYR:374:A, ALA:376:A, ASP:377:A, PRO:378:A, ALA:526:A, TYR:530:A, ARG:533:A, ASN:534:A, VAL:535:A, ILE:536:A, PRO:537:A, THR:538:A |
| 19 | 7.06 | 5.04 | -806  | Undruggable | TYR:69:A, LEU:119:A, THR:120:A, LYS:121:A, TYR:122:A, GLU:144:A, ILE:145:A, LEU:146:A, VAL:147:A, THR:148:A, TYR:149:A, ASN:150:A, ARG:181:A, LEU:212:A, ASN:213:A                                                                                                                                      |
| 20 | 6.82 | 4.96 | -812  | Undruggable | LEU:251:A, ALA:253:A, GLU:254:A, SER:255:A, HIS:256:A, VAL:257:A, ASP:258:A, THR:259:A, ASP:260:A, ILE:266:A, TRP:268:A, PHE:275:A, GLU:277:A, GLU:278:A, ARG:279:A, LYS:281:A, LEU:282:A, ARG:285:A, PHE:317:A, VAL:320:A, PHE:321:A                                                                   |
| 21 | 6.68 | 4.91 | -1317 | Undruggable | ASN:39:A, ASP:40:A, LYS:41:A, VAL:42:A, ALA:43:A, GLY:712:A, ASN:713:A, LYS:714:A, ILE:715:A, ASP:717:A, LYS:718:A, TYR:719:A, ARG:721:A, ASN:722:A, LEU:723:A, GLN:724:A, HIS:725:A, ARG:726:A, GLU:729:A                                                                                              |
| 22 | 6.52 | 4.85 | -1213 | Undruggable | TYR:69:A, TYR:87:A, LYS:91:A, ASP:92:A, CYS:93:A, PRO:94:A, ALA:95:A, VAL:96:A, ALA:97:A, LYS:98:A, HIS:99:A, GLN:117:A, ARG:118:A, LEU:119:A, THR:120:A, LYS:188:A, ASP:211:A, ASN:213:A, GLY:214:A, ASN:215:A, TRP:216:A                                                                              |
| 23 | 6.48 | 4.84 | -1370 | Undruggable | PHE:442:A, ALA:443:A, GLN:444:A, ASP:445:A, GLY:446:A, ASN:447:A, ALA:448:A, ALA:449:A, ILE:450:A, SER:451:A, ASP:452:A, TYR:453:A, TYR:455:A, LEU:544:A, LYS:551:A, ASN:552:A, ARG:553:A, ALA:554:A, ARG:555:A                                                                                         |
| 24 | 6.39 | 4.81 | -1227 | Undruggable | PHE:415:A, TYR:420:A, VAL:424:A, PHE:428:A, PHE:429:A, LYS:430:A, GLU:431:A, GLY:432:A, SER:433:A, VAL:435:A, GLU:436:A, LEU:437:A, LYS:438:A, PHE:440:A, CYS:842:A, PHE:843:A                                                                                                                          |
| 25 | 6.16 | 4.73 | -1184 | Undruggable | CYS:193:A, ASP:194:A, MET:196:A, ARG:197:A, ASN:198:A, GLY:228:A, SER:229:A, GLY:230:A, VAL:231:A, PRO:232:A, VAL:233:A, VAL:234:A, PHE:283:A, ASP:284:A, PHE:287:A, LYS:288:A, TYR:289:A, TRP:290:A, ASP:291:A, GLN:292:A, THR:293:A                                                                   |
| 26 | 5.57 | 4.53 | -1302 | Undruggable | TYR:122:A, CYS:139:A, ASP:140:A, THR:141:A, LEU:142:A, LYS:143:A, GLU:144:A, ILE:145:A, LEU:146:A, VAL:147:A, THR:148:A, ASP:153:A, ASP:154:A, ASP:155:A, TYR:156:A, PHE:157:A, ASN:158:A, TRP:162:A                                                                                                    |
| 27 | 5.47 | 4.5  | -1321 | Undruggable | ALA:423:A, LYS:426:A, GLY:427:A, PHE:428:A, PHE:429:A, LYS:430:A, GLU:431:A, GLY:432:A, SER:433:A, SER:434:A, VAL:435:A, LEU:838:A, GLN:875:A, GLU:876:A, TYR:877:A, ASP:879:A, VAL:880:A, LEU:883:A                                                                                                    |
